# Variability in the timing of a $\beta$ -catenin pulse biases a stochastic cell fate decision in *C. elegans*

Jason R. Kroll<sup>1</sup>, Jasonas Tsiaxiras, and Jeroen S. van Zon<sup>2</sup>

AMOLF  
Science Park 104  
1098 XG, Amsterdam  
Netherlands

## Summary

During development, cell fate decisions are often highly stochastic, but with the frequency of the different possible fates tightly controlled. To understand how signaling networks control the cell fate frequency of such random decisions, we studied the stochastic differentiation of the *C. elegans* P3.p cell, using time-lapse microscopy to measure the single-cell dynamics of key regulators of cell fate frequency. Strikingly, we observed that BAR-1/ $\beta$ -catenin, a key component in Wnt signaling, accumulated in a single, 1-4 hour pulse during the cell fate decision. Combining quantitative analysis and mathematical modeling, we found that the timing of the BAR-1/ $\beta$ -catenin pulse was a key determinant of the outcome of the cell fate decision. Our results highlight that timing of cell signaling dynamics, rather than its average level or amplitude, can play an instructive role in determining cell fate.

## Keywords

cell fate; *C. elegans*; stochastic dynamics; single-cell dynamics; Wnt signaling; beta-catenin; pulses

---

<sup>1</sup> Current address: Department of Biology, Utrecht University, Utrecht, Netherlands

<sup>2</sup> Lead contact (J.v.Zon@amolf.nl)

## 26 Introduction

28 During development, cells robustly obtain the correct cell fate to give rise to a viable  
adult organism, despite internal molecular noise and environmental variability. It is commonly  
30 assumed that suppressing this variability is essential for successful development. However,  
stochastic cell fate decisions, where cells randomly assume one cell fate out of a limited  
32 repertoire of different fates, is the cornerstone of many developmental processes (Johnston and  
Desplan, 2010). For example, the first cell fate decision in the mouse embryo, between  
34 trophoderm and primitive endoderm fate, is stochastic (Zernicka-Goetz et al., 2009).  
Similarly, photoreceptor cells in the human retina randomly express either a red, green or blue  
36 photoreceptor gene (Roorda and Williams, 1999; Smallwood et al., 2002). In these stochastic  
decision processes, even though each individual outcome is random, the relative frequency of  
38 the different cells fates is often tightly controlled.

40 Currently, stochastic cell fate decisions are best understood in the context of single-  
celled organisms, where gene expression noise dominates as the key source of variability  
42 driving stochastic cell fate decisions (Balaban, 2004; Losick and Desplan, 2008; Maamar et al.,  
2007; Süel et al., 2006). However, it is unclear how stochastic cell fate decisions are regulated  
44 during animal development, as multicellular organisms pose unique constraints compared to  
single-celled organisms. Here, stochastic cell fate decisions have to be precisely coordinated  
46 with developmental timing, are potentially influenced by neighboring cells and rely on external,  
long-range signals mediated by a small number of key developmental signaling pathways. How  
48 these canonical signaling pathways drive stochastic cell fate decisions with strong control over  
cell fate frequencies is an open question.

50  
Even though *C. elegans* development occurs in a largely invariant manner (Sulston et  
52 al., 1983), some cell fate decisions occur in a stochastic manner. One such decision is the  
specification of vulval precursor cell (VPC) competence group, beginning in the early in the L2  
54 larval stage (Gleason et al., 2002; Myers and Greenwald, 2007). This group consists of six  
epidermal cells named P3.p-P8.p, which are subsequently patterned to various vulval cell fates  
56 by multiple signaling pathways (Eisenmann et al., 1998; Félix, 2012; Gleason et al., 2002;  
Gupta et al., 2012; Hill and Sternberg, 1993; Sternberg and Horvitz, 1986). The establishment of  
58 the VPC competence group is partly stochastic, as the P3.p cell assumes VPC fate in roughly  
50% of wild-type hermaphrodites (Fig. 1a), while in the remainder, P3.p assumes hypodermal  
60 fate by fusing to a neighboring syncytial hypodermal cell, called hyp7 (Shemer and Podbilewicz,  
2002; Sternberg and Horvitz, 1986). The exact cell fate ratio varies with environmental  
62 conditions and genetic backgrounds (Braendle and Félix, 2008; Pénigault and Félix, 2011a).

64 The Wnt pathway is a highly conserved signaling pathway that regulates many  
developmental events and cell fates (Clevers and Nusse, 2012; Hirabayashi, 2004; Hudson et  
66 al., 2013; Lindström et al., 2014; Mucenski et al., 2003; Ohyama, 2006). Previous investigations  
into the P3.p cell fate decision showed that its cell fate frequency is extremely sensitive to the  
68 dosage of Wnt ligands, particularly *cwn-1*, suggesting that variability in the ligand concentration

70 or in the response of the P3.p cell to Wnt ligands could provide the noise source driving the  
71 stochastic fate decision (Pénigault and Félix, 2011a, 2011b). In the canonical pathway, the  
72 presence of Wnt ligands leads to the accumulation of the transcriptional co-activator BAR-1/ $\beta$ -  
73 catenin, which co-regulates Wnt pathway target genes (Eisenmann et al., 1998; Korswagen,  
74 2002; Korswagen et al., 2000; Sawa and Korswagen, 2013). In addition to the Wnt pathway,  
75 mutations in the *C. elegans* Hox gene *lin-39* impact the Pn.p cell fate frequencies, by repression  
76 of cell fusion and promoting division of VPC fate cells (Clark et al., 1993; Koh et al., 2002;  
77 Maloof and Kenyon, 1998; Roiz et al., 2016; Shemer and Podbilewicz, 2002). Both Wnt  
78 signaling and LIN-39 inhibit hyp7/fusion fate, with loss-of-function mutants exhibiting increased  
79 frequency of cell fusion, including in the P4.p-P8.p cells that otherwise never assume  
80 hyp7/fusion fate (Gleason et al., 2006; Myers and Greenwald, 2007). However, what aspects of  
81 Wnt signaling and LIN-39 dynamics control the frequency of hyp7/fusion versus VPC fate in  
82 P3.p remains unknown.

83  
84 Here, we use a novel time-lapse microscopy approach (Gritti et al., 2016) to observe  
85 gene expression and signaling dynamics in single Pn.p cells during specification of the VPCs,  
86 allowing us to directly connect variability during the decision process to the final cell fate  
87 outcome. Using this approach, we found that BAR-1/ $\beta$ -catenin accumulated in a single, ~1-4 hr  
88 pulse in the Pn.p cells at the time of the hyp7/fusion versus VPC fate decision, with strong  
89 variability in pulse slope and timing. Combining quantitative data analysis with mathematical  
90 modeling, we found that cell fate outcome depended strongly on the time of the BAR-1/ $\beta$ -  
91 catenin pulse onset, identifying the timing of Wnt signaling dynamics as a key control parameter  
92 of cell fate.

## Results

### 94 Time-lapse microscopy of a stochastic cell fate decision

96 So far, whether P3.p undergoes fusion or assumes VPC fate in wild-type or mutant  
97 animals has been assessed only after the process has completed (Alper and Kenyon, 2001,  
98 2002; Chen and Han, 2001; Eisenmann et al., 1998; Myers and Greenwald, 2007; Pénigault  
99 and Félix, 2011a, 2011b). To correlate early stochastic molecular events to eventual cell fate  
100 outcome it is essential to follow these processes directly in time. Here, we utilize a fluorescent  
101 time-lapse microscopy approach we developed recently to study single-cell dynamics inside  
102 moving and feeding *C. elegans* larvae for their entire ~40hr development (Gritti et al., 2016). We  
103 tested whether we could directly observe P3.p fusion events in single animals. We initially used  
104 two measures of cell fusion: first, imaging the apical junction protein AJM-1, which localizes on  
105 the apical edge of Pn.p cells but is degraded upon cell fusion (Brabin et al., 2011). Second,  
106 observing the flow of GFP from the hypodermis into the fused Pn.p cell, using animals carrying  
107 an extrachromosomal array targeting GFP expression to the hyp7 hypodermal syncytium. Initially  
108 the AJM-1::mCherry signal expanded along the A-P axis during the early L2 larval stage  
109 (Supplementary Movies 1-2, Fig. 1c). In animals with a fusing cell, this was followed by a  
110 sudden and pronounced ruffling of the AJM-1::mCherry signal and a rapid retraction of AJM-  
111 1::mCherry towards the posterior, with the fluorescent signal fully disappearing from P3.p within  
112 1 hr (Fig. 1c). Inflow of GFP from the hypodermis into P3.p was observed as soon as AJM-  
113 1::mCherry retraction commenced (Fig. 1c,d), showing that both are accurate markers of (the  
114 time of) fusion. Because AJM-1::mCherry was more easily monitored, we used AJM-1 dynamics  
to establish fate and timing of P3.p fusion for all subsequent experiments.

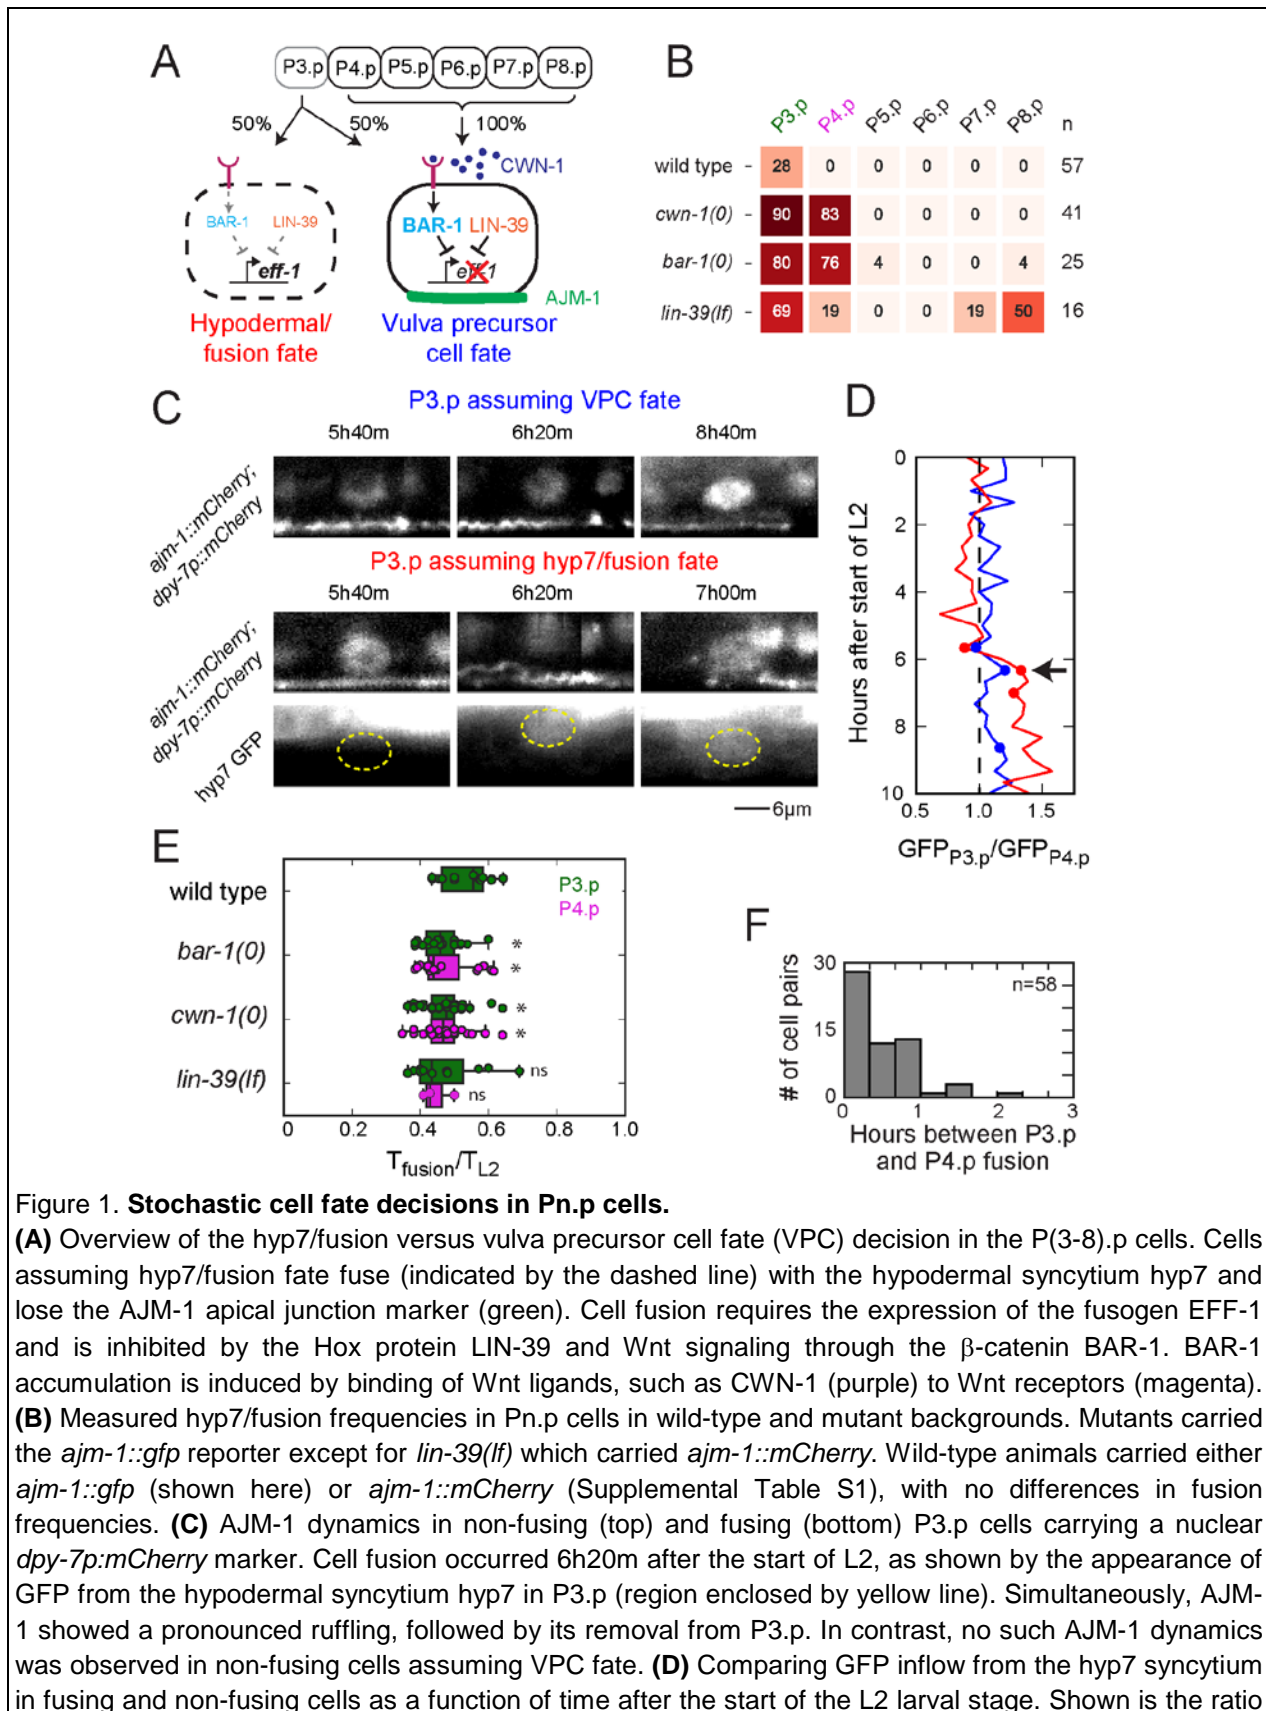

132 of GFP fluorescence intensity between P3.p and P4.p in the same animal, where P4.p never fused. The  
134 blue and red line corresponds to the non-fusing and fusing cell in (C). Markers correspond to the time  
136 points shown in (C). Arrow indicates the time of AJM-1 ruffling and coincides exactly with inflow of GFP  
138 into the fusing cell. **(E)** Individual cell fusion times and box-and-whisker plots for P3.p (green) and P4.p  
140 cells (magenta) in different genetic backgrounds. Fusion time was determined for AJM-1 dynamics and is  
expressed as fraction of the L2 larval stage duration  $T_{L2}$  (~8hrs for all backgrounds). Even though small,  
but significant differences exist in average fusion time between strains (one-way ANOVA followed by  
Student's t-test, \* indicates  $P < 0.05$ ), the full distributions show extensive overlap. **(F)** Distribution of  
difference in cell fusion time between P3.p and P4.p cells, where both cells fuse (data pooled for all  
genotypes with double fusions).

142 Even though changes to the frequency of P3.p hyp7/fusion versus VPC fate in mutants  
are well studied (Alper and Kenyon, 2001, 2002; Chen and Han, 2001; Eisenmann et al., 1998;  
144 Myers and Greenwald, 2007; Pénigault and Félix, 2011a, 2011b), it was not known how such  
mutants impact the timing of this decision. We quantified the time of P3.p fusion in wild-type  
146 animals and found that cell fusion occurred in a relatively narrow time window between 40-60%  
of the L2 larval stage (Fig. 1f). We then examined mutants in which fusion frequency is  
148 increased by removing inhibitory Wnt signaling or LIN-39 (Fig. 1b). We found that in these  
mutants P3.p fusion occurred within the same time window as wild-type animals, with only small  
150 differences between wild-type and mutant animals in average timing (Fig. 1f). Strikingly, even  
though the exact time of fusion can vary as much as 2 hrs between animals, when multiple  
152 VPCs fuse in a single animal, they typically do so at the same time (Fig. 1g). The observation  
that, in the absence of key repressors of hyp7/fusion fate, cell fusion frequency is increased  
154 independently of its timing provides evidence that a yet-unknown signal exists that activates cell  
fusion at the appropriate time. In contrast, hyp7/fusion inhibitors (Wnt signaling, LIN-39) do not  
156 control timing of fusion, but rather modulate hyp7/fusion versus VPC fate frequency.

## 158 Stochastic *eff-1* induction precedes P3.p fusion

160 The most downstream regulator of the hyp7/fusion versus VPC fate decision is the gene  
*eff-1*, a fusogenic protein whose expression is sufficient to induce cell fusion (Mohler et al.,  
162 2002; Shemer et al., 2004). EFF-1 is a transmembrane protein that is required for most cell  
fusions in *C. elegans*, and must be present on both the Pn.p and hyp7 plasma membrane to  
164 induce fusion (Zeev-Ben-Mordehai et al. 2014; Smurova and Podbilewicz 2016). To understand  
how cell fate frequency is regulated on the level of *eff-1* expression, we counted *eff-1* mRNA  
166 molecules in Pn.p cells, using single molecule FISH (smFISH) (Raj et al., 2008). In wild-type  
animals in the late L1 and early L2 stage (230 - 350  $\mu\text{m}$  in body length), the stage of  
168 development immediately preceding the hyp7/fusion versus VPC fate decision, we found that all  
P3.p cells were unfused, as determined by the presence of the AJM-1 signal, and exhibited low  
170 *eff-1* expression in P3.p, <5 molecules (Fig. 2a,c), similar to the P4.p cell that always assumes  
VPC fate in wild-type animals. However, in older, mid-L2 stage animals (350 - 395  $\mu\text{m}$  in  
172 length), corresponding to the time of fusion, we observed a subset of animals expressing ~30-  
50 molecules in unfused P3.p cells, something not observed in P4.p (Fig. 2b-c). In fused P3.p  
174 cells, we found similar number of *eff-1* mRNA molecules located in close proximity to the cell

nucleus, suggesting that high *eff-1* expression is maintained after fusion, before finally disappearing by the end of the L2 stage (Supplemental Fig. 1a,b). We confirmed that high *eff-1* expression preceded cell fusion, rather than following it, by examining a temperature-sensitive loss-of-function point mutation in *eff-1* (Mohler et al., 2002). Here, we still found high *eff-1* mRNA levels in P3.p at the restrictive temperature, even as P3.p cell fusion was fully inhibited (Supplemental Fig. 1c).

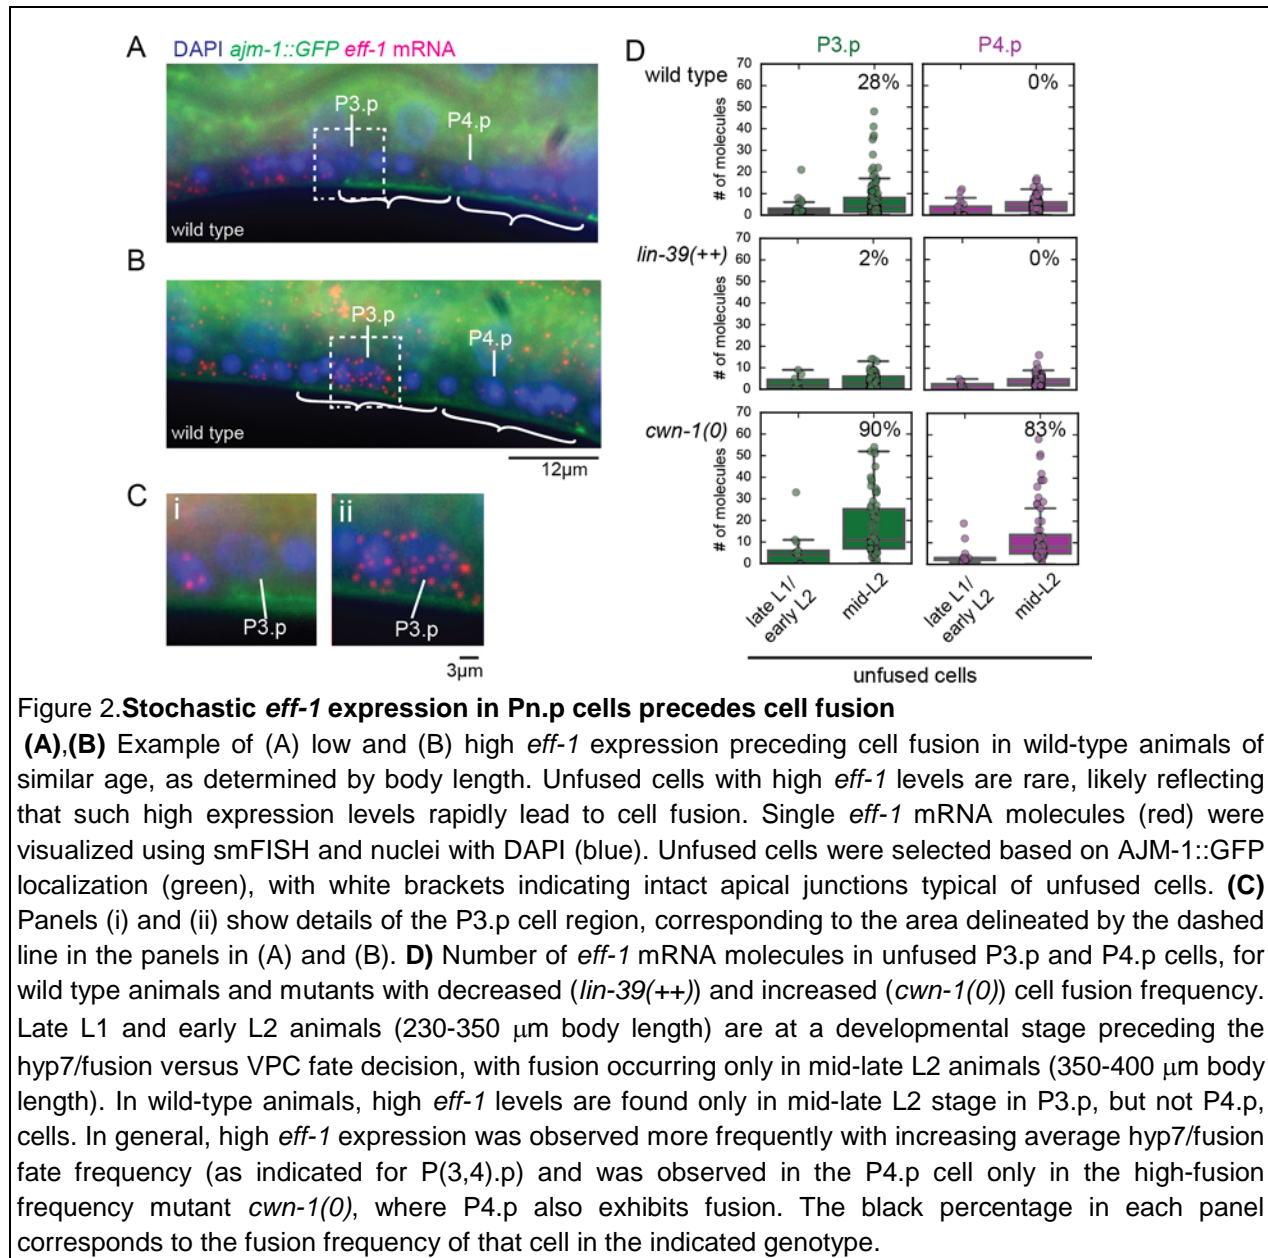

182

184 **(A), (B)** Example of (A) low and (B) high *eff-1* expression preceding cell fusion in wild-type animals of similar age, as determined by body length. Unfused cells with high *eff-1* levels are rare, likely reflecting that such high expression levels rapidly lead to cell fusion. Single *eff-1* mRNA molecules (red) were visualized using smFISH and nuclei with DAPI (blue). Unfused cells were selected based on AJM-1::GFP localization (green), with white brackets indicating intact apical junctions typical of unfused cells. **(C)** Panels (i) and (ii) show details of the P3.p cell region, corresponding to the area delineated by the dashed line in the panels in (A) and (B). **(D)** Number of *eff-1* mRNA molecules in unfused P3.p and P4.p cells, for wild type animals and mutants with decreased (*lin-39(++)*) and increased (*cwn-1(0)*) cell fusion frequency. Late L1 and early L2 animals (230-350  $\mu\text{m}$  body length) are at a developmental stage preceding the hyp7/fusion versus VPC fate decision, with fusion occurring only in mid-late L2 animals (350-400  $\mu\text{m}$  body length). In wild-type animals, high *eff-1* levels are found only in mid-late L2 stage in P3.p, but not P4.p, cells. In general, high *eff-1* expression was observed more frequently with increasing average hyp7/fusion fate frequency (as indicated for P(3,4).p) and was observed in the P4.p cell only in the high-fusion frequency mutant *cwn-1(0)*, where P4.p also exhibits fusion. The black percentage in each panel corresponds to the fusion frequency of that cell in the indicated genotype.

200 An interesting result is that the fraction of wild-type animals showing high (>20 molecules) *eff-1* mRNA levels in P3.p was significantly smaller than the expected fraction of animals where P3.p assumes hyp7/fusion fate. For our analysis, we randomly sampled animals within the time window we expected fusion to occur. Given the observed variability in the time of

202

204 fusion (Fig. 1f), it is expected that some animals with low *eff-1* expression would have ultimately  
fused at a later point. In particular, the fraction of animals observed with high *eff-1* expression in  
206 unfused P3.p cells should increase with the average duration the cell expresses high *eff-1*  
before this results in fusion. Hence, our results suggested that induction of high *eff-1* expression  
208 was quickly followed by cell fusion.

210 To understand how *eff-1* expression impacts cell fate frequency, we quantified *eff-1*  
levels in a strain with a functional LIN-39::GFP insertion (*lin-39(++)*) that caused low fusion  
212 frequency (~2% P3.p fusion frequency). Consistently, we no longer observed unfused P3.p cells  
expressing high (>20 molecules) *eff-1* levels. (Fig. 2c). In contrast, in the *cwn-1(0)* mutant that  
214 lacks the dominant Wnt ligand and exhibited high (>80%) fusion frequency both in P3.p and  
P4.p, we found that the numbers of unfused cells observed with high *eff-1* expression had  
216 increased substantially, most strikingly in P4.p (Fig. 2c). Together, this indicates that Wnt  
signaling and LIN-39 controlled cell fate frequency mainly by tuning the fraction of cells in which  
218 high *eff-1* expression is induced.

## 220 Weak bias of cell fate decision by noise in LIN-39 protein level

222 The Hox transcription factor LIN-39 inhibits Pn.p hyp7/fusion fate by repressing *eff-1*  
expression (Shemer and Podbilewicz, 2002), with *lin-39* null mutations causing all Pn.p cells to  
224 fuse in the L1 larval stage (Clark et al., 1993; Wang et al., 1993). Hence, stochastic variability in  
LIN-39 protein levels could result in variability in induction of high *eff-1* expression. It was shown  
226 previously that LIN-39 levels are similar between P3.p and P4.p in early L2 larval stage animals  
prior to cell fusion (Pénigault and Félix, 2011a), even though both cells have a different fate  
228 frequency (Fig. 1b). However, individual cells were not followed over time and linked to the  
eventual cell fate, and it is possible that small differences in LIN-39 between P3.p cells in  
230 different animals are sufficient to explain the outcome. To connect animal-to-animal variability in  
LIN-39 level with P3.p cell fate, we performed time-lapse microscopy on animals carrying an  
232 integrated low-copy *lin-39::GFP* translational fusion (Sarov et al., 2012) and *ajm-1::GFP* as a  
cell fusion marker (Fig. 3a,b). Since *lin-39::GFP* (*lin-39(++)*) is present as an insertion, it  
234 decreased the P3.p fusion rate from ~30% to ~2%, making it challenging to capture sufficient  
P3.p fusion events for analysis. For that reason, we further crossed this reporter into the *cwn-*  
236 *1(0)* mutant, increasing the P3.p and P4.p fusion rates to 20% and 14%, respectively.

238 We observed that LIN-39 was present in the P3.p nucleus at the start of the L2 larval  
stage and remained there for the entire larval stage when P3.p assumed VPC fate (Fig. 3a,c).  
240 However, in P3.p cells that fused, nuclear LIN-39 levels decreased rapidly after fusion  
commenced and fully disappeared within 90 mins (Fig.3b,c), consistent with past observations  
242 of loss of LIN-39 in fused Pn.p cells (Pénigault and Félix, 2011a). LIN-39 levels were not  
significantly different in the *cwn-1(0)* mutant compared to wild type, further supporting the  
244 argument that LIN-39 and Wnt act independently in parallel pathways to repress *eff-1* and cell  
fusion. We compared the distribution of LIN-39 levels, averaged over 3 hrs prior to fusion in  
246 P3.p cells that assumed hyp7/fusion fate with the distribution in P3.p cells that assumed VPC  
fate, averaged over 3hrs prior to the average time of P3.p fusion in this strain (Fig. 3d). We



248 found strong overlap between the two distributions, also when changing the size of the time  
 window (data not shown), making it unlikely that fluctuations in LIN-39 levels are the main driver  
 250 of stochastic *eff-1* induction and cell fusion.

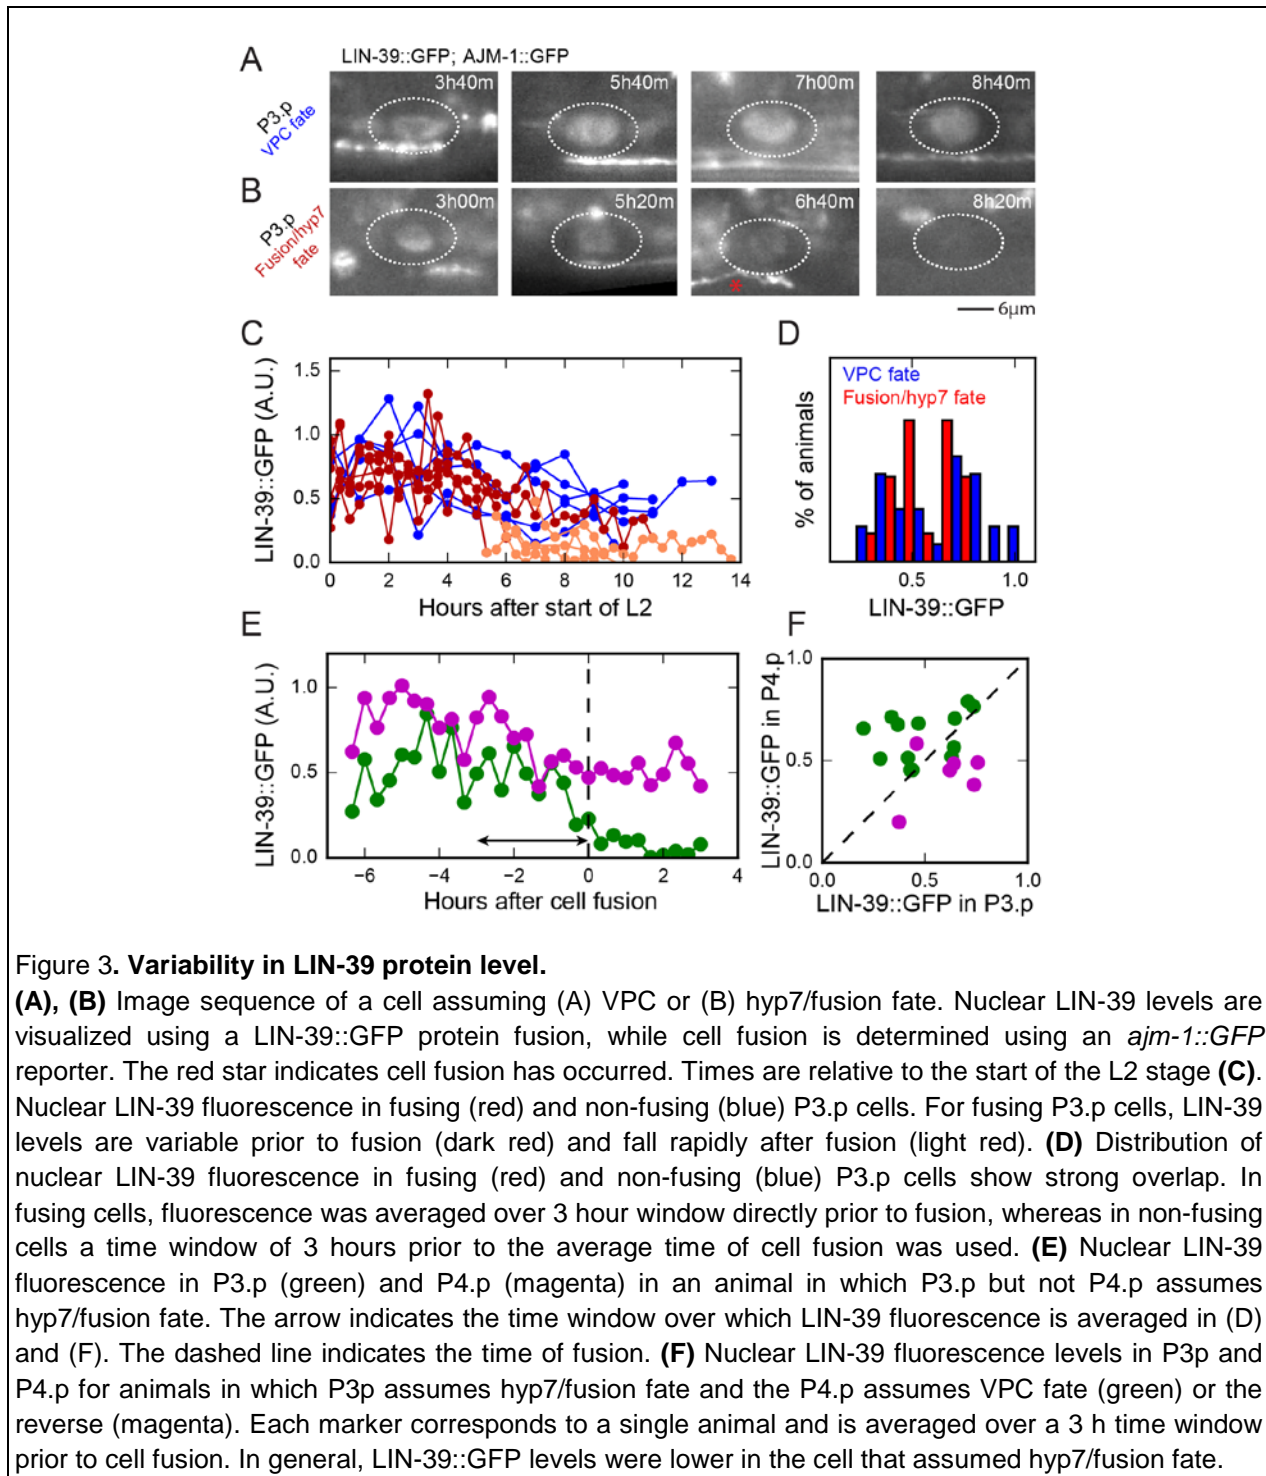

252

Figure 3. **Variability in LIN-39 protein level.**

254 **(A), (B)** Image sequence of a cell assuming (A) VPC or (B) hyp7/fusion fate. Nuclear LIN-39 levels are  
 256 visualized using a LIN-39::GFP protein fusion, while cell fusion is determined using an *ajm-1::GFP*  
 258 reporter. The red star indicates cell fusion has occurred. Times are relative to the start of the L2 stage **(C)**.  
 260 Nuclear LIN-39 fluorescence in fusing (red) and non-fusing (blue) P3.p cells. For fusing P3.p cells, LIN-39  
 262 levels are variable prior to fusion (dark red) and fall rapidly after fusion (light red). **(D)** Distribution of  
 264 nuclear LIN-39 fluorescence in fusing (red) and non-fusing (blue) P3.p cells show strong overlap. In  
 266 fusing cells, fluorescence was averaged over 3 hour window directly prior to fusion, whereas in non-fusing  
 268 cells a time window of 3 hours prior to the average time of cell fusion was used. **(E)** Nuclear LIN-39  
 fluorescence in P3.p (green) and P4.p (magenta) in an animal in which P3.p but not P4.p assumes  
 hyp7/fusion fate. The arrow indicates the time window over which LIN-39 fluorescence is averaged in (D)  
 and (F). The dashed line indicates the time of fusion. **(F)** Nuclear LIN-39 fluorescence levels in P3.p and  
 P4.p for animals in which P3.p assumes hyp7/fusion fate and the P4.p assumes VPC fate (green) or the  
 reverse (magenta). Each marker corresponds to a single animal and is averaged over a 3 h time window  
 prior to cell fusion. In general, LIN-39::GFP levels were lower in the cell that assumed hyp7/fusion fate.

268

270 These results leave open the question whether the observed variability in LIN-39 has  
any effect on the P3.p cell fate outcome. In *lin-39::GFP; cwn-1(0)* animals, P4.p also assumed  
272 hyp7/fusion fate in a stochastic manner, allowing us to test whether differences in LIN-39 levels  
between P3.p and P4.p are correlated with their eventual fate. First, we established that in this  
274 strain LIN-39 distributions for P3.p and P4.p were similar and also showed substantial overlap  
between fusing and non-fusing cells. We then selected animals in which one cell, either P3.p or  
276 P4.p, fused but the other assumed VPC fate (Fig. 3e). Indeed, in these animals absolute LIN-39  
level was not predictive of the eventual fate of P3.p or P4.p, but we observed a significant  
278 correlation between fate and the difference in LIN-39 levels between P3.p and P4.p (Fig. 3f),  
with fusing cells having lower LIN-39 than their non-fusing neighbor cell ( $P = <0.01$ , Fisher's  
280 Exact Test). This shows that noise in LIN-39 levels drives the hyp7/fusion versus VPC fate  
decision, but likely in conjunction with another noise source.

282

## $\beta$ -catenin activation dynamics during the cell fate decision

284

We next quantified activation of the Wnt pathway by monitoring the accumulation  
286 dynamics of BAR-1/ $\beta$ -catenin in a strain carrying a *bar-1::GFP* reporter. In the absence of Wnt  
ligands,  $\beta$ -catenin is continuously degraded by a degradation complex. Upon activation of Wnt  
288 receptors by Wnt ligands, activity of the degradation complex is stopped, allowing  $\beta$ -catenin to  
accumulate in the cell and nucleus (Sawa and Korswagen, 2013). In P3.p, the presence of  
290 BAR-1 is required to inhibit *eff-1* expression and, hence, inhibit hyp7/fusion fate (Eisenmann et  
al., 1998). In contrast to  $\beta$ -catenins involved in the Wnt asymmetry pathway (Mila et al., 2015;  
292 Park and Priess, 2003), dynamics of BAR-1 during canonical Wnt signaling is poorly  
characterized. Here, we monitor BAR-1::GFP dynamics using a multi-copy integrated  
294 transgene, *gals45*, which rescues the *bar-1(0)* phenotype (Eisenmann et al., 1998) and has  
been used previously to study BAR-1 dynamics during male hook development (Yu et al.,  
296 2009). Similar transgenes have been used extensively to study the dynamics of the *C. elegans*  
 $\beta$ -catenins SYS-1 (Robertson et al., 2017) and WRM-1 (Kim et al., 2013). A disadvantage of  
298 using a multi-copy insertion is that the elevated BAR-1 level perturbed the observed P3.p fate  
frequency. However, a key advantage is its increased fluorescence signal, which is crucial for  
300 imaging its dynamics using our time-lapse imaging approach.

302 So far, Wnt ligand expression levels and its resulting spatial protein distribution are  
found to be largely constant in time (Coudreuse et al., 2006; Pani and Goldstein, 2018). Hence,  
304 we expected BAR-1 to show constant expression and dynamics in P(3-8).p cells, similar to LIN-  
39. Instead, we found that BAR-1::GFP levels were strikingly dynamic, with no BAR-1::GFP in  
306 P(3-8).p at the start of the L2 stage, followed by steady accumulation of BAR-1::GFP in P(3-8).p  
at the mid-L2 stage that lasted 1-4 hours and was strongly coordinated between cells  
308 (Supplemental Movie 3, Fig. 4a-c). After the accumulation phase, BAR-1 was rapidly degraded,  
with the overall dynamics of BAR-1 resembling a single pulse. The protein was detected in both  
310 the nucleus and cytoplasm. We found stochastic variability in the amplitude of the BAR-1 pulse  
between different Pn.p cells (Fig. 4b,c). It was speculated that P3.p, which is considered most  
312 distant to the source of Wnt ligands, receives a lower Wnt signal than P(4-8).p, thereby resulting

314 in its occasional hyp7/fusion fate (Harterink et al., 2011; Pénigault and Félix, 2011b). However,  
 315 the BAR-1::GFP accumulation pulse in P3.p was frequently of similar or higher amplitude  
 316 compared to the other Pn.p cells and, in general, we found no sign of a systematic spatial  
 317 pattern in Wnt signaling. We also found significant variability in the amplitude and timing of the  
 318 BAR-1::GFP pulse in the P3.p cell compared between different animals (Fig. 4d).

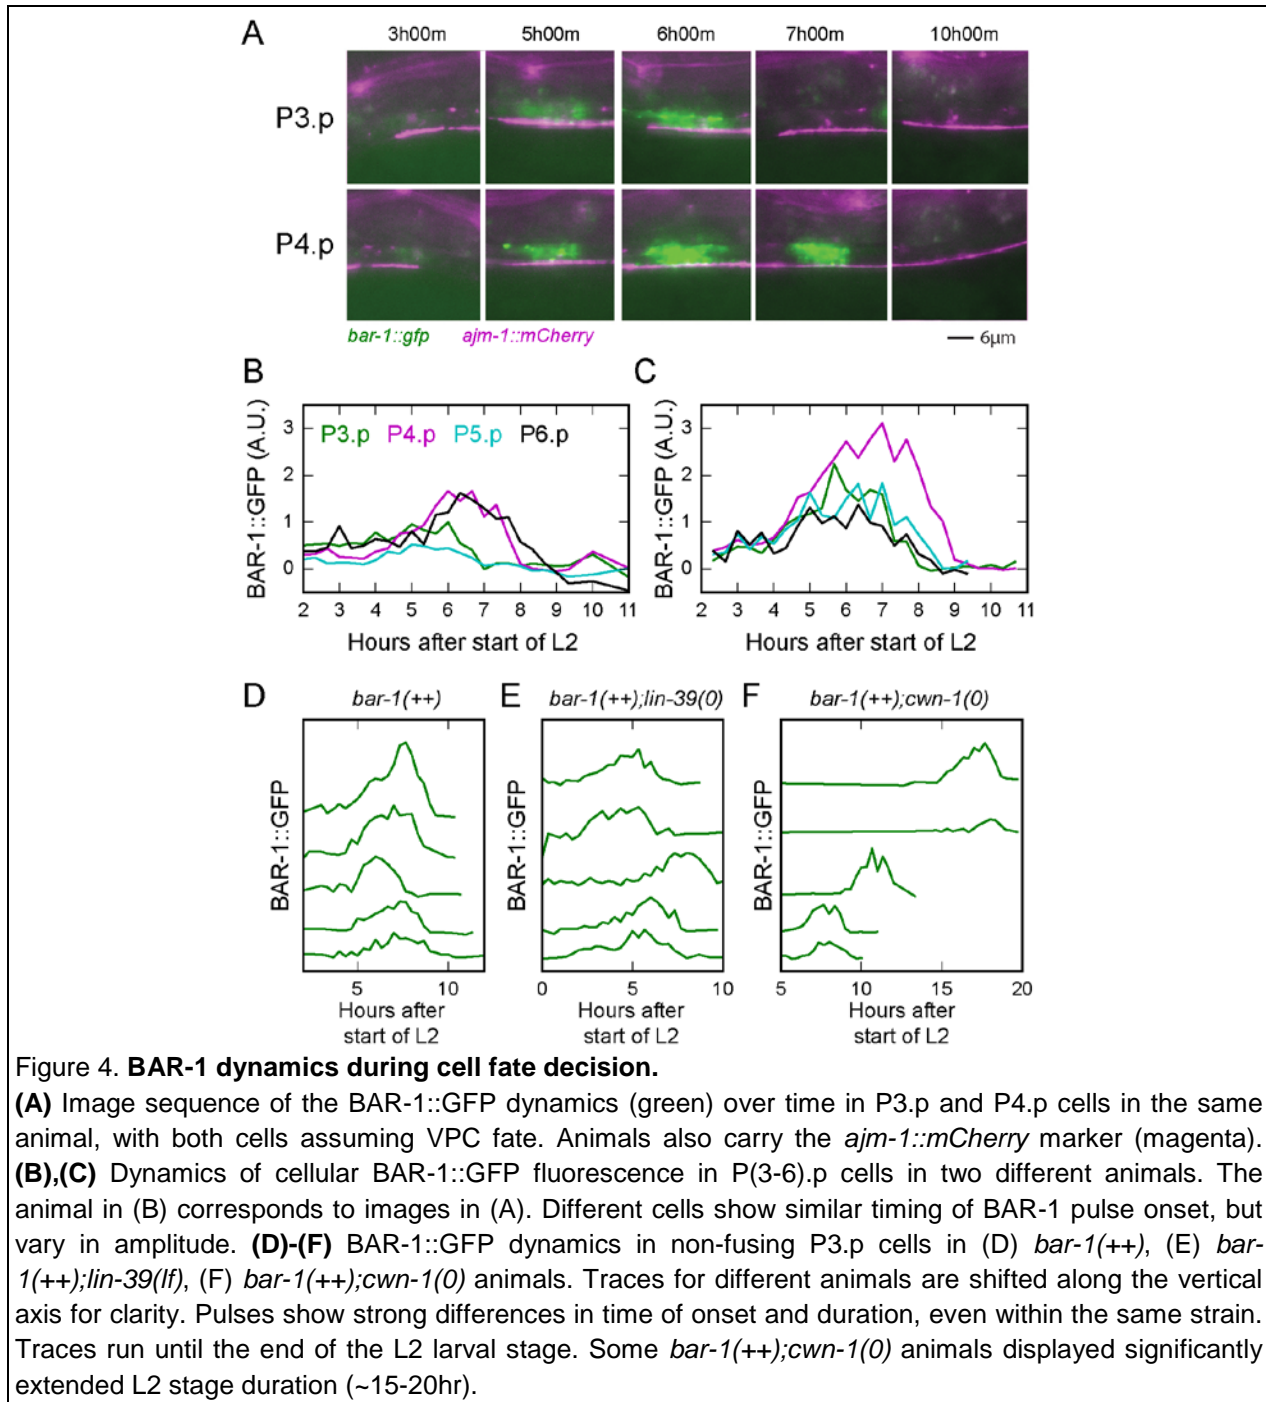

330

332 Since the BAR-1::GFP reporter is integrated as a functional multi-copy transgene, we  
333 expected this strain to act as a BAR-1 overexpression mutant and, indeed, observed no P(3-  
334 8).p cell fusions (Supplemental Table 1). Hence, we refer to this strain as *bar-1(++)*. To study  
335 how BAR-1 dynamics relates to cell fate frequency, we used different approaches to increase  
336 the frequency of hyp7/fusion fate. First, we decreased the level of the inhibitor LIN-39, using the  
337 *lin-39(n709)* temperature sensitive loss-of-function mutant (Supplemental Table S1). We found  
338 that *bar-1(++);lin-39(lf)* animals showed similar BAR-1::GFP dynamics (Fig. 4e). Interestingly,  
339 cells that fused always did so during the early accumulation phase of the BAR-1 pulse (Fig. 5a).  
340 Next, we sought to lower BAR-1 levels in the *bar-1(++)* background by decreasing activity of the  
341 Wnt signaling pathway, using the *cwn-1(0)* mutant that lacks the CWN-1 Wnt ligand (Fig. 1a). In  
342 these animals, BAR-1::GFP pulse amplitude was lower (Fig. 4f). In some *bar-1(++);cwn-1(0)*  
343 animals the L2 stage was significantly lengthened. Moreover, we found that BAR-1::GFP pulse  
344 occurred at significantly later times, as a fraction of larval stage duration, even in animals with a  
345 L2 larval stage duration similar to wild-type. Finally, the BAR-1 pulse also showed considerable  
346 variability in timing and amplitude in these mutants, and cell that fused always did so during the  
early accumulation phase of the pulse.

## Variability in $\beta$ -catenin dynamics

348 To characterize variability in BAR-1 accumulation dynamics, we used a minimal  
349 parameterization of the BAR-1 pulse shape to fit to the experimental data (Fig. 5a, Eq. 3 in  
350 Methods). Briefly, we assume that prior to the BAR-1 pulse, Wnt signaling is inactivated and  
351 BAR-1 is degraded. At pulse onset time  $t_0$ , Wnt signaling is activated, leading to inhibition of  
352 BAR-1 degradation and hence linear accumulation of BAR-1 in the cell. Linear BAR-1  
353 accumulation continues for a pulse duration  $T$  in cells that assume VPC fate or until the time of  
354 fusion,  $t_{\text{fusion}}$ , in cells that assume hyp7/fusion fate. Upon fusion BAR-1 vanishes immediately,  
355 as observed experimentally, whereas in cells that assume VPC fate, BAR-1 levels decrease  
356 exponentially once the pulse ends. This fitted the experimental data surprisingly well (Fig. 5a,b).  
357 Moreover, it allowed us to describe each BAR-1 pulse by three parameters: pulse onset time  $t_0$ ,  
358 pulse slope  $s$  and pulse duration  $T$  for VPC cells or fusion time  $t_{\text{fusion}}$  for hyp7/fusion cells.

360 First, we compared the distribution of pulse onset time  $t_0$  and linear slope  $s$  of each  
361 BAR-1 accumulation pulse between strains. We found that both were highly variable between  
362 animals in all strains (Fig. 5c,d). We found that the pulse parameters of *bar-1(++)* and *bar-  
363 1(++);lin-39(lf)* were similar, consistent with increase in hyp7/fusion fate frequency in this mutant  
364 resulting from the absence of the fusion inhibitor LIN-39 rather than changes in Wnt signaling. In  
365 contrast, we assumed that the increase in frequency of hyp7/fusion fate in *bar-1(++);cwn-1(0)*  
366 animals was due to a decrease in BAR-1 level. In the context of the observed BAR-1 pulse, this  
367 could be achieved in two independent ways, either by decreasing the slope  $s$  or by delaying the  
368 onset time  $t_0$  of the BAR-1 pulse relative to the time of fusion (Fig. 6a,b). Given that BAR-1  
369 accumulation is thought to be proportional to the amount of external Wnt ligands, we expected  
370 the *cwn-1(0)* mutant, that lacks the CWN-1 Wnt ligand, to have a decreased rate of BAR-1  
accumulation. Surprisingly, we found that the pulse slope distribution was highly similar for *bar-*

372  $1(++)$  and  $bar-1(++)$ ;  $cwn-1(0)$  animals (Fig. 5c) and that the only different characteristic was the  
 374 delayed pulse onset (Fig. 5d).

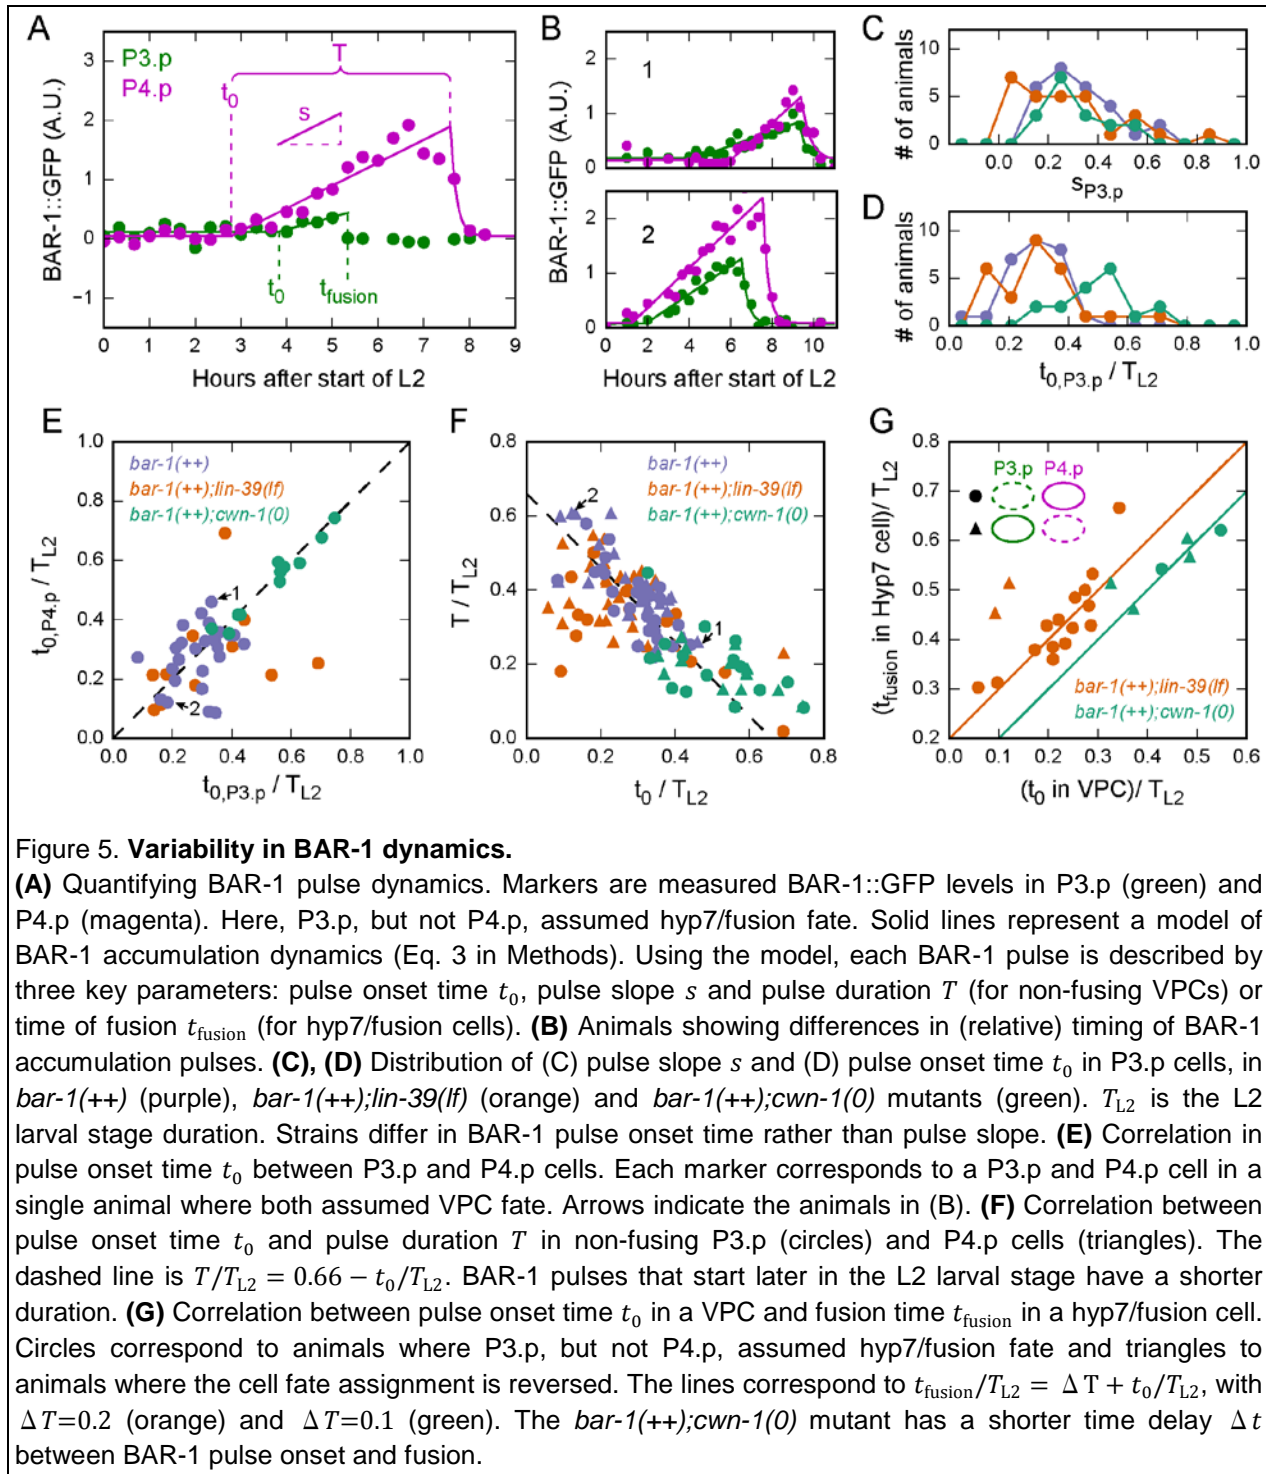

394 We then compared the timing of the onset of BAR-1 accumulation between P3.p and  
 396 P4.p cells. Both in  $bar-1(++)$  and  $bar-1(++);lin-39(lf)$  animals, considerable variability existed in

398  $t_0$ , the time of the onset of the BAR-1 pulse, between these cells, with BAR-1 accumulation in  
P3.p preceding that in P4.p as often as the reverse (Fig. 5b,e). At the same time, pulse onset  
was correlated between P3.p and P4.p, meaning that if BAR-1 accumulation started late in the  
400 L2 larval stage in P3.p, it was also likely to start late in P4.p (Fig. 5e). Strikingly, we not only  
found that in the *bar-1(++);cwn-1(0)* mutant the onset of the BAR-1 pulse was delayed, but also  
402 that the variability in pulse onset time between P3.p and P4.p was almost completely removed,  
with the onset of BAR-1 accumulation occurring in P3.p and P4.p within 20 min in all animals  
404 (Fig. 5e). This result suggests that the Wnt ligand *cwn-1* not only controls the average onset of  
BAR-1 pulses, but also induces variability in pulse onset time between P3.p and P4.p.

406  
We also observed variability in the duration of BAR-1 pulses when comparing the pulse  
408 in the same cell between animals (Fig. 5b,f). We examined whether the onset and the duration  
of the BAR-1 pulse was correlated. Because the duration of the L2 larval stage varied  
410 significantly between strains and animals, we examined the pulse onset time  $t_0/T_{L2}$  and  
duration  $T/T_{L2}$  relative to the duration of the larval stage,  $T_{L2}$ . In this case, we found a striking  
412 anti-correlation, with late pulse onset resulting in shorter pulses (Fig. 5f). In fact, the data for all  
strains clustered along the line  $T/T_{L2} = 0.66 - t_0/T_{L2}$ , consistent with a model in which the end  
414 of the BAR-1 accumulation occurs at 66% of the L2 larval stage independent of the BAR-1 pulse  
onset time. This correlation also held for the *bar-1(++);cwn-1(0)* mutant, where not only the  
416 onset of the BAR-1 pulse was delayed but also the L2 larval stage was much extended. Hence,  
the BAR-1 pulse ended independent of its onset time  $t_0$  in all mutants examined.

418  
Given that we observed strong variability in pulse onset time relative to the time the  
420 pulse ceases (Fig. 5f), we asked whether the time of cell fusion was correlated with either the  
pulse start or end time. However, because cell fusion is immediately followed by rapid  
422 degradation of BAR-1, it was not possible to determine the pulse end time in cells that assumed  
*hyp7/fusion* fate. At the same time, P4.p cells often assumed *hyp7/fusion* fate in *bar-1(++);lin-*  
424 *39(lf)* and *bar-1(++);cwn-1(0)* animals. Therefore, we selected animals where one Pn.p cell,  
either P3.p or P4.p, assumed *hyp7/fusion* fate whereas the other assumed VPC fate. We then  
426 compared within the same animal the fusion time  $t_{\text{fusion}}$  in the *hyp7/fusion* cell with the pulse  
onset time  $t_0$  (Fig. 5g) or the pulse end time  $t_0 + T$  (Supplemental Fig. 2) in the VPC. For *bar-*  
428 *1(++);lin-39(lf)* animals, the time of fusion correlated most strongly with the pulse onset time  
( $R=0.86$ , P3.p fusing only) rather than pulse end time ( $R=0.56$ ). Specifically, the data clustered  
430 along the line  $t_{\text{fusion}}/T_{L2} = 0.2 + t_0/T_{L2}$ , i.e. cell fusion occurs at a time  $0.2T_{L2}$ , or on average ~2  
hrs, after the onset of the BAR-1 pulse. Because the *bar-1(++);cwn-1(0)* mutant has the same  
432 pulse slope distribution as the *bar-1(++)* mutant (Fig. 5c), we examined whether the increased  
*hyp7/fusion* frequency in the *bar-1(++);cwn-1(0)* mutant was due to a shorter delay between  
434 pulse onset and time of fusion. Indeed, we found that in *bar-1(++);cwn-1(0)* animals the delay  
was halved, with cell fusion now occurring at a time  $0.1T_{L2}$  after onset of the BAR-1 pulse (Fig.  
436 5g). We found before that *bar-1(++);cwn-1(0)* animals have a similar rate of BAR-1  
accumulation as *bar-1(++)* (Fig. 5c). Delaying the pulse onset relative to the time of fusion would  
438 be an alternative mechanism to lower inhibitory BAR-1 levels.

## 440 Bias of cell fate decision by variability in $\beta$ -catenin pulse timing

442 To elucidate the mechanism by which the dynamics of the BAR-1 pulse might impact *eff-*  
444 *1* expression and cell fate frequency, we constructed a mathematical model of the cell fate  
446 induction network that takes into account variability in the BAR-1 pulse slope and timing (Fig.  
448 6a-c, see Materials and Methods for details). In the model, hyp7/fusion fate requires sufficiently  
450 high *eff-1* expression. We assumed that an activator controls the timing of cell fusion in the  
452 absence of the fusion inhibitors BAR-1 and LIN-39, consistent with our observations in Fig. 1f. In  
454 contrast, BAR-1 and LIN-39 then modulate cell fate outcome by inhibiting *eff-1* expression.  
456 Specifically, *eff-1* expression is induced only when the activator, but not BAR-1 and LIN-39 are  
bound to the *eff-1* promoter (Fig. 6a). Here, BAR-1 is expected to control *eff-1* expression in a  
complex with the Wnt effector POP-1 (Korswagen et al., 2000). In the model, we assumed that  
the activator is only present from time  $t_{\text{fusion}}$  at a level  $c_a$  (Fig. 6b). Also, we assumed that the  
level of the inhibitor Wnt signal,  $c_w(t)$ , followed the observed BAR-1 dynamics, rising from the  
pulse onset time  $t_0$  with linear slope  $s$  (Fig. 6b). Finally, we assumed stochastic variability in  
activator level, pulse slope and time of pulse onset and fusion.

458 We constrained almost all model parameters by experimental data (See Materials and  
460 Methods) as follows: using experimentally measured correlations between i) pulse onset time in  
462 different cells and ii) pulse onset time and time of fusion in the same cell, we estimated the  
464 relative contributions of global and cell-specific variability in timing of pulse onset and cell fusion.  
466 Next, we fitted the observed distribution of pulse slopes by a Gaussian distribution  
468 (Supplemental Fig. 3a). Finally, we adjusted the parameters governing the action of LIN-39 and  
470 the activator to reproduce the observed hyp7/fusion frequency in the different strains  
472 (Supplemental Fig. 3e). For all mutants, the resulting model provided an excellent fit to the  
474 observed distributions of pulse onset time  $t_0$  and slope  $s$  (Supplemental Fig. 3a-d), the joint  
476 distribution of  $t_0$  in P(3,4).p (Supplemental Fig. 3f) and that of  $t_0$  and fusion time  $t_{\text{fusion}}$   
(Supplemental Fig. 3g). In the model, the increased frequency of hyp7/fusion fate in *bar-1(++);*  
*lin-39(lf)* animals was due to absence of LIN-39 increasing the range of activating and inhibitory  
signals  $c_a$  and  $c_w$  for which *eff-1* is expressed sufficiently highly, whereas in the *bar-1(++);cwn-*  
*1(0)* mutant, the reduced delay between  $t_0$  and the time,  $t_{\text{fusion}}$ , when the activator becomes  
available causes lower inhibitory Wnt signals  $c_w$  at  $t_{\text{fusion}}$  (Supplemental Fig. 3e). We used the  
model to examine a hypothetical mutant that achieves the same hyp7/fusion frequency as the  
*bar-1(++);cwn-1(0)* mutant, but by changing pulse slope rather than pulse onset time. We found  
that this mutant was clearly distinguishable from the *bar-1(++);cwn-1(0)* mutant in terms of pulse  
slope distribution and delay between pulse onset and time of fusion (Supplemental Fig. 3b,g),  
providing further evidence that the change in pulse timing is the key reason hyp7/fusion fate is  
increased in the *bar-1(++);cwn-1(0)* mutant.

478

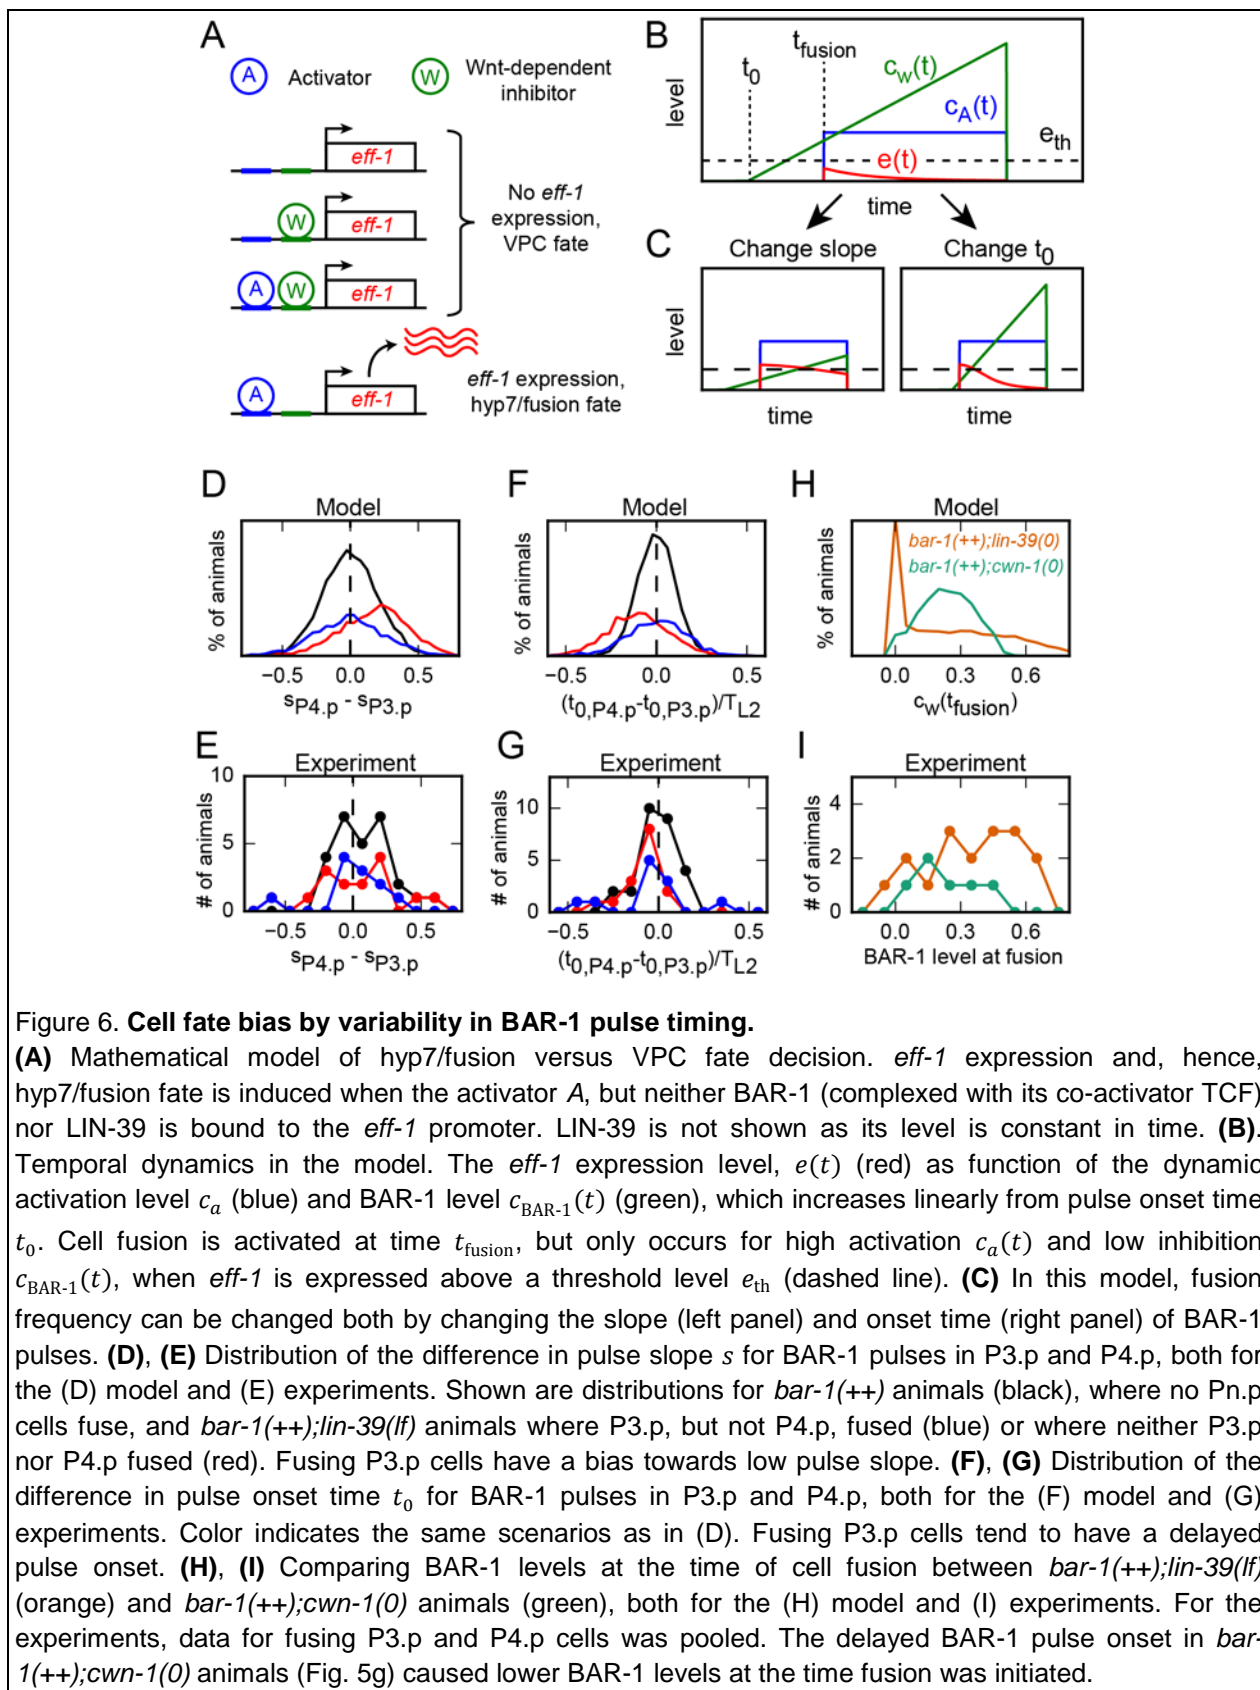

480

482

484

486

488

490

492

494

496

498



500 We next used the model to ask whether variability in BAR-1 pulse timing impacts the  
502 outcome of individual cell fate decisions, focusing on the *bar-1(++);lin-39(lf)* mutant that  
504 produced most hyp7/fusion cells. We examined the difference in pulse slope and onset time in  
506 *bar-1(++); lin-39(lf)* animals, comparing animals where P3.p fused but P4.p assumed VPC fate  
508 with animals where both P3.p and P4.p assumed VPC fate. The model predicted that for  
510 animals where both cells assume VPC fate, the distributions  $P(s_{p4,p}-s_{p3,p})$ , of difference in pulse  
512 slope, and  $P(t_{0,p4,p}-t_{0,p3,p})$ , of difference in pulse onset time, are symmetrical (Fig. 6d,f, blue  
514 line). However, the model predicted a bias towards low pulse slope and late pulse onset time in  
516 fusing P3.p cells compared to non-fusing P4.p cells (Fig. 6d,f, red line), because both decrease  
518 the amount of inhibitory BAR-1. In agreement with the model, we found that the experimentally  
520 obtained distributions of difference in pulse slope and onset time between P3.p and P4.p were  
522 symmetrical, both in *bar-1(++)* animals, where P(3,4).p never fuse, and *bar-1(++);lin-39(lf)*  
524 animals selected so that both cells assumed VPC fate (Fig. 6e,g, black and blue lines).  
526 However, in *bar-1(++);lin-39(lf)* animals where P3.p, but not P4.p, assume hyp7/fusion fate, we  
528 found a weak bias towards lower pulse slope in P3.p and a significantly stronger bias towards  
530 delayed BAR-1 pulse onset in fusing P3.p cells compared to non-fusing P4.p cells (Fig 6e,g, red  
532 line), with only one animal with a fusing P3.p cell showing BAR-1 accumulation in P3.p prior to  
534 P4.p. This difference was particularly striking compared to the *bar-1(++)* strain, which otherwise  
536 showed no difference in relative timing of BAR-1 pulse onset between P3.p and P4.p relative to  
*bar-1(++);lin-39(lf)* animals (Fig. 5c).

520 Even though the above results indicated that BAR-1 pulse timing biased the hyp7/fusion  
522 versus VPC fate decision, it left open whether variations in pulse timing achieve this by  
524 specifically modulating BAR-1 levels at the time the decision to fuse or not is made. The model  
526 predicted that at the time of fusion cells assuming hyp7/fusion fate in *bar-1(++);cwn-1(0)*  
528 mutants should have lower BAR-1 levels than fusing cells in *bar-1(++);lin-39(lf)* mutants, where  
530 fusion frequency is instead increased by removing the inhibitor LIN-39 (Fig. 6h). Indeed, when  
532 we compared BAR-1::GFP fluorescence at the time of cell fusion in *bar-1(++);lin-39(lf)* and *bar-*  
534 *1(++);cwn-1(0)* animals, we found a bias towards lower BAR-1 levels in fusing P3.p and P4.p  
536 cells in the *cwn-1(0)* background (Fig. 6i).

530 To further link BAR-1 levels to inhibition of cell fusion, we quantified *eff-1* transcripts  
532 using smFISH in *bar-1(++)* animals and indeed found a negative correlation: Pn.p cells with  
534 visible BAR-1::GFP had few *eff-1* transcripts, while unfused Pn.p cells without BAR-1::GFP  
536 often showed high *eff-1* levels (Supplemental Figure 4). Together, these results show that  
changes in the timing of BAR-1 accumulation pulses are a key determinant of the hyp7/fusion  
versus VPC fate decision, likely by impacting the BAR-1 level at the time of the decision.

## 538 Discussion

### 540 **BAR-1/ $\beta$ -catenin pulse dynamics**

542 Here, we combined a novel time-lapse microscopy approach with quantitative analysis  
544 and mathematical modeling to study, in developing *C. elegans* larvae, how the outcome of a  
546 stochastic cell fate decision is controlled by random variability in the dynamics of the underlying  
548 signaling network. Surprisingly, we found that BAR-1/ $\beta$ -catenin, a core component of the Wnt  
550 pathway, accumulated in Pn.p cells in a dynamic, pulsatile manner (Fig. 4) that was precisely  
552 timed to influence their stochastic choice between vulva precursor or hypodermal fate, with the  
554 latter fate inhibited by BAR-1/ $\beta$ -catenin. Moreover, we found that the timing of the BAR-1/ $\beta$ -  
556 catenin pulse was a key control parameter influencing the relative frequency of these two cell  
558 fates: first, we observed that the increase in hypodermal fate frequency in *bar-1(++);cwn-1(0)*  
560 mutants, compared to that in *bar-1(++)* mutants, was not due to systematic changes in the slope  
562 of the BAR-1/ $\beta$ -catenin pulse, but rather to a systematic decrease in the time delay between the  
564 pulse onset and the time of the cell fusion event that defines hypodermal fate (Fig. 5). Second,  
566 in the *bar-1(++);lin-39* mutant we found that Pn.p cells that assume hypodermal fate have a later  
568 pulse onset than those cells in the same animal that assume vulva precursor fate (Fig. 6).  
570 Experiments and modeling suggest that pulse timing influences the cell fate decision by  
572 changing the level of BAR-1/ $\beta$ -catenin, and hence the amount of inhibition of hypodermal fate,  
574 at the time that hypodermal fate and cell fusion are induced (Fig. 6). Overall, these results  
576 indicate that for the cell fate decision studied here, it is not the absolute BAR-1/ $\beta$ -catenin level  
578 per se, as is generally assumed, but rather the timing of its accumulation dynamics relative to  
580 other developmental events, that is a key factor determining the stochastic cell fate outcome. A  
similar method of regulatory control was seen in *Saccharomyces cerevisiae*, where proteins Msn2 and Mig1 regulated gene expression through the modulation of their relative pulse timing and overlapping expression over time (Lin et al., 2015).

### 566 **Mechanism of BAR-1/ $\beta$ -catenin single pulse generation**

568 A striking feature of the BAR-1/ $\beta$ -catenin pulse dynamics is their body-wide coordination:  
570 despite considerable differences in time of pulse onset, both between mutants (Fig. 5d) and  
572 between Pn.p cells within the same mutant (Fig. 5e), the pulse is otherwise synchronized  
574 between the multiple adjacent Pn.p cells (Fig. 4), with the time of the end of the pulse highly  
576 similar in all mutants (Fig. 5f). It is an important question how the BAR-1/ $\beta$ -catenin pulse is  
578 generated. BAR-1/ $\beta$ -catenin accumulation could be controlled by changes in the level of the Wnt  
580 ligands outside of the cell or rather by changes in the Wnt pathway components inside the cell,  
such as changes to Wnt receptor levels or presence/activity of components of the  $\beta$ -catenin  
destruction complex. We currently favor the latter hypothesis, since neuronal cells close to the  
Pn.p cells show BAR-1::GFP expression in the late L1/early L2 stage when Pn.p cells do not,  
with a significantly decreased BAR-1::GFP signal in those cells in a *cwn-1(0)* background. This  
suggests that Wnt ligands are already present and able to activate Wnt signaling at this time  
and position in the body. An important question is whether the observed pulse dynamics is

582 influenced by the elevated levels of BAR-1 in the reporter strain used. Most importantly, the  
584 absence of BAR-1::GFP prior to the pulse and its rapid disappearance directly afterwards  
586 showed that the increased *bar-1* expression level was still sufficiently low to not overwhelm the  
destruction complex. Hence, if the BAR-1 accumulation pulse is controlled by the activity of the  
destruction complex, as is expected, BAR-1 should exhibit the same pulse dynamics under wild-  
type conditions.

588 Our observations differ significantly from the current model of Wnt signal propagation at  
a number of points. First, as ligand-activated Wnt receptors sequester and thereby inactivate  
590 the destruction complex that induces  $\beta$ -catenin degradation, it was expected that changing Wnt  
levels would predominantly impact the rate of  $\beta$ -catenin accumulation (Clevers and Nusse,  
592 2012; Sawa and Korswagen, 2013). However, using the *cwn-1(0)* mutant we found that  
removing a Wnt ligand instead changed only the timing of the induced BAR-1/ $\beta$ -catenin pulse  
594 (Fig. 4, 5c,d), which is difficult to explain based on our current knowledge of the Wnt pathway.  
Particularly surprising is that loss of *cwn-1* almost completely removed the variability in BAR-  
596 1/ $\beta$ -catenin pulse timing between adjacent Pn.p cells in the same animal (Fig. 5e). In absence of  
CWN-1, other Wnt ligands such as EGL-20 repress hypodermal fate, albeit at reduced efficiency  
598 (Pénigault and Félix, 2011b). Our results indicate that CWN-1 acts in a significantly more  
stochastic manner, either on the level of ligand/receptor interaction or the delivery of ligands to  
600 the Pn.p cells, than the other Wnt ligands in the body, even though it is the Wnt ligand  
expressed closest to the Pn.p cells (Eisenmann, 2005; Harterink et al., 2011). It was also  
602 suggested that cells respond to fold change rather than the absolute level of  $\beta$ -catenin  
(Goentoro and Kirschner, 2009). However, this is inconsistent with our observation that cell fate  
604 frequency is impacted by changes in timing of BAR-1/ $\beta$ -catenin pulse onset, which do not  
impact fold change, rather than changes in pulse slope (Fig. 5c,d). Moreover, we find higher  
606 levels of inhibitory BAR-1/ $\beta$ -catenin at the time of cell fusion in mutants that lack the parallel  
hypodermal/fusion fate inhibitor LIN-39 (Fig. 6i), another indication that absolute BAR-1/ $\beta$ -  
608 catenin levels control the frequency of hypodermal fate.

610 It is an open question how the decay of the BAR-1/ $\beta$ -catenin pulse is controlled in time.  
Negative feedback of the Wnt/ $\beta$ -catenin pathway has been shown to occur through the regulator  
612 Axin, which could be responsible for shutting off  $\beta$ -catenin accumulation (Jho et al., 2002).  
However, this negative feedback model implies that the end of the pulse would be tightly linked  
614 to the pulse onset, rather than occurring at a fixed point in the larval stage independent of the  
start of the pulse, as we observed (Fig 5f). We speculate, based on the link between the BAR-  
616 1/ $\beta$ -catenin pulse end time and the timing of the larval stage, that this aspect of pulse timing is  
regulated by the molting cycle. In particular, it has been shown that many genes show body-  
618 wide gene expression oscillations, peaking once every larval stage but at different phases  
(Hendriks et al., 2014). Some of these genes might be responsible for switching of BAR-1/ $\beta$ -  
620 catenin accumulation in all Pn.p cells simultaneously. Our data indeed suggested that a Wnt-  
independent timing mechanism is present, as the time of cell fusion was unperturbed in a *bar-  
622 1(0)* mutant (Fig. 1f). In general, our observations suggest that timing of BAR-1/ $\beta$ -catenin  
accumulation dynamic can be regulated both by Wnt-dependent signals and Wnt-independent  
624 developmental timing cues.

## 626 **Role of $\beta$ -catenin pulse dynamics in development**

628 It is increasingly clear that many of the canonical metazoan signaling pathways control  
630 development using temporal information encoded in their dynamics (Levine et al., 2013;  
632 Shimojo et al., 2008) In particular, pulses in the output of signaling pathways have now been  
634 identified *in vivo* in a number of developmental systems. For example, a recent study showed  
636 that EGF signaling acts in a pulsatile manner in the VPCs, with signaling strength transmitted in  
638 the frequency of pulses instead of a continuous graded signal (de la Cova et al., 2017).  
640 Moreover, time-lapse imaging of oscillatory, rather than pulsatile dynamics of Notch and Wnt  
642 signaling during segmentation of mouse embryos showed that the relative phase of the two  
636 oscillations instructs the segmentation process by an unknown mechanism (Sonnen et al.,  
2018). In this study Wnt signaling was monitored indirectly, using an Axin rather than a  $\beta$ -  
catenin reporter. So far, the dynamics of  $\beta$ -catenin accumulation have rarely been studied  
directly. Single pulses of  $\beta$ -catenin have been observed (Murphy et al., 2014, Kafri et al., 2016),  
although mostly in cell lines following exogenous application of Wnt ligands rather than in the  
natural context of the body. For all these studies, timing of the individual  $\beta$ -catenin pulse was not  
directly linked to a specific cell fate outcome.

644 It remains an open question what the advantage is of activating BAR-1/ $\beta$ -catenin as a  
646 pulse rather than the being present continuously like the parallel hypodermal fate inhibitor LIN-  
39 (Fig. 3). Our mathematical model indicates one potential advantage, namely that BAR-1/ $\beta$ -  
catenin pulsatile dynamics allows for pulse timing as an additional control parameter, next to  
648 BAR-1/ $\beta$ -catenin accumulation rate, to tune cell fate frequency (Fig. 6). Whether cells receive  
650 Wnt input is tightly controlled in space, e.g. by regulating Wnt receptor expression. Pulsatile  
652 dynamics could be a powerful mechanism to control precisely when cells respond to ligands in  
654 time. This might be particularly important because the same signaling pathways are used many  
656 times during development, sometimes even in the same cell, to control different developmental  
658 events. Reading out these signaling pathways only at particular time points would allow the  
660 reconfiguration of the pathway from executing one developmental decision to another.  
Interestingly, Wnt signaling is used in VPCs at the mid-L3 stage, ~10 hrs after the hypodermal  
versus VPC decision, to control the anteroposterior orientation of their asymmetric divisions  
(Green et al., 2008). Here, EGL-20 plays an important role, whereas BAR-1 and CWN-1 have a  
smaller contribution. The decay of the BAR-1/ $\beta$ -catenin pulse at the end of the L2 stage might  
be crucial to avoid temporal crosstalk between the outputs of the Wnt pathway as the VPCs  
transition from one process to the next.

662 In conclusion, we have shown here that  $\beta$ -catenin accumulation can be highly dynamic  
664 during development, with temporal information instructing development contained in its  
666 dynamics. Many (stochastic) cell fate decisions in organism from nematodes to humans are  
controlled by Wnt signaling and it will be interesting to see whether pulsatile  $\beta$ -catenin plays a  
similar role in biasing cell fate frequencies in those systems. The quantitative approach we  
employed here, combining *in vivo* time-lapse imaging of  $\beta$ -catenin dynamics with measurements

668 of key dynamical parameters such as pulse slope and pulse timing, can provide a template for  
such future studies.

## 670 Materials and Methods

### CONTACT FOR REAGENT AND RESOURCE SHARING

672 Further information and requests for resources and reagents should be directed to and will be fulfilled by the Lead Contact, Jeroen van Zon (j.v.zon@amolf.nl).

### 674 EXPERIMENTAL DETAILS

#### Strains

676 All strains were handled according to the standard protocol on Nematode growth medium (NGM) agar plates with OP50 bacteria (Brenner, 1974). Experiments were performed  
678 on L2 stage hermaphrodites. Strains were obtained from the CGC unless otherwise indicated.

680 The following mutations were used in this study:

LGII: *cwn-1(ok546)* (The *C. elegans* Deletion Mutant Consortium, 2012),

682 LGIII: *lin-39(gk893)* (The *C. elegans* Deletion Mutant Consortium, 2012), *lin-39(n709)* (Clark et al., 1993)

684 LGX: *bar-1(ga80)* (Eisenmann et al., 1998)

686 The following transgenes were used in this study:

*ncls13[ajm-1::GFP]*, (Liu et al., 2005),

688 *sls11337[rCesY37A1B.5::GFP + pCeh361]* (MCKAY et al., 2003),

*ouls20 [ajm-1::mCherry + unc-119+]* (gift from Alison Woollard),

690 *itls37[pie-1p::mCherry::H2B::pie-1 3'UTR + unc-119(+)] IV*, *stls10116[his-72(promoter)::his-24::mCherry::let-858 3'UTR + unc-119(+)]*, *stls10311[lin-39::TGF(3D3)::GFP::TY1::3xFLAG]*

692 (Sarav et al., 2012),

*gals45[pDE218(bar-1::bar-1::GFP)]* (gift from David Eisenmann) (Eisenmann et al., 1998), and

694 *stls10226[his-72p::HIS-24::mCherry::let-858 3' UTR + unc-119(+)]* (Sarav et al., 2012).

696 The presence of the *cwn-1(ok546)* homozygous deletion was confirmed by nested PCR screening. The following primers were used: outer left ('5-TCGTTTCTGACATGGCTCAC-3'),  
698 outer right ('5-ACCCATCCTTTCCCAATCTC-3'), inner left ('5-CGTATCCACGACCACAACAG-3') and inner right (5'-AGAATCTTACACCAACGGG-3').

700

#### Time-lapse imaging

702 The microchamber size used in the study was 190  $\mu$ m x 190  $\mu$ m, with a depth of 10  $\mu$ m and made as previously described and imaged with a custom time-lapse microscope (Gritti et al., 2016). Using an eyelash attached to a glass pipette, OP50 bacteria were used as "glue" to  
704 transfer eggs into the microchambers using M9 solution to keep the microchamber moist. A  
706 Nikon Ti-E inverted microscope with a large chip camera (Hamamatsu sCMOS Orca v2) and a  
60 X magnification objective (NA=1.4 oil immersion) was used for imaging. Transmission  
708 imaging was performed using an LED light source (CoolLED pE-100 615nm), while 488 and 561  
nm fluorescence images were acquired using Coherent OBIS LS 488-100 and OBIS LS 561-  
710 100 lasers, respectively. Images were acquired in a temperature controlled room at 19° with a  
sample temperature of 22°. Exposure time was 10 ms and approximately 25 images were taken

712 with a z-distance of 1  $\mu$ m. Images were taken every 20 min. Images were 2048 x 2048 pixels  
714 and saved in 16-bit TIFF format. Fusion times were determined by *ajm-1::GFP* localization and  
morphology.

### 716 **Quantitative Image Analysis**

For all experiments, transmitted light images were used to identify molt times. Custom  
718 Python scripts and ImageJ were used to quantitatively analyze the acquired images (Schindelin  
et al., 2012; Schneider et al., 2012). First, images to be used for quantitative analysis were  
720 corrected for uneven laser illumination in the following manner: flat field intensity for the  
722 particular experiment was obtained by imaging a uniformly fluorescent (488nm) testing slide,  
and averaging the result of 10 images. We divided each pixel's intensity value in the  
724 experimental images by the corresponding flat field pixel's intensity, normalized to the median  
value of the entire flat field image. This normalization procedure corrects for position-dependent  
726 variation in light intensity due to the Gaussian profile of the laser beam. The region of interest  
was cropped at this time. Pn.p cells were manually identified by stereotyped nuclear position  
728 location and the domains of *ajm-1::gfp/mcherry* expression, if present. To measure LIN-39::GFP  
expression, a mask was manually drawn around the nucleus and the mean fluorescence  
730 intensity of the pixels within the mask was calculated. The z-slice closest to the center of the  
nucleus was used. A background fluorescence measurement for each image was obtained by  
732 creating a mask of the intranuclear space in a region near P3.p and P4.p along the axis of the  
ventral nerve cord. The mean background fluorescence value was then subtracted from the  
734 mean fluorescence value of the reporter for the same image. To measure BAR-1::GFP  
expression, a mask was manually drawn around the Pn.p cytoplasmic region using AJM-  
736 1::mCherry signal as a positional guide, with background corrections performed similarly as  
described above. For the Supplementary Movies, fluorescence images were computationally  
738 straightened and aligned, using the animal's body shape and position of the Pn.p cells as  
measured from the fluorescent markers.

### 740 **Single-molecule fluorescence in situ hybridization (smFISH)**

Probe design and smFISH hybridization to visualize *eff-1* mRNA transcripts were  
742 performed as previously described (Huelsz-Prince and van Zon, 2017; Raj et al., 2008). Custom  
probes were designed against the exons of the *eff-1* gene by utilizing the Stellaris® RNA FISH  
744 Probe Designer (Biosearch Technologies, Inc., Petaluma, CA). The probes were hybridized with  
the Cy5 dye (Huelsz-Prince and van Zon, 2017). The sequences of the oligonucleotide probes  
746 used in this study are listed in Supplementary Methods Table 1. Animals were collected by  
washing plates with M9 and were fixed in 4% formaldehyde in 1 X PBS for 45 min at room  
748 temperature. Fixed animals were permeabilized in 70% ethanol at least one night at 4°C.  
Subsequently, animals were incubated with the 0.5  $\mu$ l probes overnight at 30°C in Stellaris®  
750 Hybridization Solution containing 10% formamide. The next day, animals were quickly washed  
two times with 10% formamide and 2 X SSC, followed by an incubation wash for 30 min at  
752 30°C. DAPI was added at 0.01  $\mu$ g/ml in a final incubation step for 20 min at 30°C. Animals were  
mounted in Glox Buffer with catalase and glucose oxidase, and images were acquired with a  
754 Nikon Ti-E inverted fluorescence microscope, equipped with a 100X plan-apochromat oil-  
immersion objective and an Andor Ikon-M CCD camera controlled by  $\mu$ Manager software

756 (Edelstein et al., 2014). Stacks of each animal were taken with a z-distance of 0.33  $\mu\text{m}$  and  
 approximately 30 images were taken per animal. Cy5 exposure time was 3 s, while DAPI and  
 758 GFP exposure time were 100 ms and 500 ms, respectively. Animals were then imaged at 40X  
 to determine their body length, which was measured using ImageJ by drawing a spline from the  
 760 tip of the head to the end of the tail. smFISH images were analyzed with a custom Python script  
 using techniques previously described (Raj et al., 2008). The *ajm-1::gfp* transgene was used to  
 762 determine the cell fusion status. For Supplemental Figure 4, ImageJ was used to quantify GFP  
 fluorescence in the Pn.p cellular region of P3-P6.p by selecting the slice most central to the  
 764 nucleus. The cellular region was then manually outlined and the mean fluorescence value of the  
 cellular region was quantified.

766

## MODEL DETAILS

### 768 Parameterization and fitting of BAR-1::GFP dynamics

To fit the experimentally measured BAR-1::GFP dynamics, we assume the following  
 770 minimal model of BAR-1 production and degradation:

$$\frac{dc_{\text{BAR-1}}}{dt} = k_p - k_d \frac{1}{1 + \alpha S(t)} c_{\text{BAR-1}}, \quad (1)$$

where  $c_{\text{BAR-1}}$  is the BAR-1 level and  $k_p$  is the BAR-1 production rate. In the absence of Wnt  
 772 signaling,  $S(t)=0$ , the degradation complex degrades BAR-1 at a basal rate  $k_d$ . However, in the  
 presence of Wnt signaling,  $S(t)=1$ , the degradation complex is inhibited (Eisenmann, 2005) and  
 774 degradation occurs at a reduced rate  $\frac{k_d}{1+\alpha}$ , with  $\alpha > 1$ . In the model, we assume the BAR-1 pulse  
 is generated by changes in Wnt signaling level  $S(t)$ . In particular, we assume Wnt signaling is  
 776 activated at a constant level  $S(t)=1$  starting at time  $t_0$  and ending at time  $t_0+T$ , where  $T$  is the  
 pulse duration. For other times, Wnt signaling is not activated,  $S(t)=0$ . These assumptions yield  
 778 the following expression for the BAR-1 dynamics:

$$c_{\text{BAR-1}}(t) = \begin{cases} \frac{k_p}{k_d} & t < t_0 \\ \frac{k_p}{k_d}(1 + \alpha) - \alpha \frac{k_p}{k_d} e^{-k_d \frac{t-t_0}{1+\alpha}} & t_0 \leq t < t_0 + T \\ \frac{k_p}{k_d} + \alpha \frac{k_p}{k_d} \left(1 - e^{-k_d \frac{T}{1+\alpha}}\right) e^{-k_d(t-t_0-T)} & t_0 + T < t \end{cases} \quad (2)$$

For sufficiently long pulse duration  $T$ , the BAR-1 level will reach a steady state  $c_{\text{BAR-1}} = \frac{k_p}{k_d}(1 +$   
 780  $\alpha)$ . However, in the experimentally obtained data we never observed BAR-1::GFP levels  
 reaching a steady state before the end of the pulse. Instead, we found that BAR-1::GFP  
 782 accumulation remained approximately linear throughout the full duration of the pulse. Indeed,  
 when the pulse duration is sufficiently short or the Wnt-mediated inhibition of BAR-1 degradation  
 784 is sufficiently strong, i.e.  $(1 + \alpha) \gg k_d T$ , the exponential term in  $c_{\text{BAR-1}}(t)$  for  $t_0 \leq t < t_0 + T$  reduces  
 to an expression that linearly with time in linear fashion, giving rise to the following expression  
 786 used to fit the experimental data:



$$c_{\text{BAR-1}}(t) = \begin{cases} \frac{k_p}{k_d} & t < t_0 \\ \frac{k_p}{k_d} + k_p \frac{\alpha}{1 + \alpha} (t - t_0) & t_0 \leq t < t_0 + T \\ \frac{k_p}{k_d} + k_p \frac{\alpha}{1 + \alpha} T e^{-k_d(t-t_0-T)} & t_0 + T < t \end{cases} \quad (3)$$

We fitted this expression to the experimental BAR-1::GFP data by least-square fitting, using the implementation of the Levenberg-Marquardt algorithm, as implemented in the Python function `scipy.optimize.curve_fit` (Eric Jones et al., 2001) and using  $k_p$ ,  $k_d$ ,  $\alpha$ ,  $t_0$  and  $T$  as fit parameters. We obtained these fit parameters for each Pn.p cell by independent fitting. For fusing cells, we fitted  $c_{\text{BAR-1}}(t)$  to the experimental data only for time points until the experimentally determined time of fusion,  $t_{\text{fusion}}$ . We found that cell fusion always occurred before the end of the pulse, i.e.  $t_0 + T > t_{\text{fusion}}$  and, hence,  $T$  was not defined for fusing cells. In general, this fitting procedure provides good fits for most BAR-1::GFP trajectories, but fails to converge to a correct fit for trajectories with very low pulse amplitude or no apparent pulse. In that case, we assume  $c_{\text{BAR-1}}(t) = 0$ , with  $t_0$  and  $T$  not defined. To characterize pulse dynamics for non-fusing cell, we compare pulse onset time  $t_0$ , pulse duration  $T$  and pulse slope  $s = k_p \frac{\alpha}{1 + \alpha}$ . For fusing cells, pulse duration is not defined and instead we compare the time of fusion.

## 800 Mathematical model of stochastic Pn.p cell fate decision

*Wnt signaling and eff-1 expression.* The model is briefly summarized in Fig. 6A,B of the main text. We assume that Wnt signaling (through BAR-1) and LIN-39 inhibit *eff-1* expression, whereas an activator A, whose identity is currently not known, induce *eff-1* expression. BAR-1 likely controls *eff-1* expression as a complex with the TCF/LEF transcription factor POP-1 (Korswagen et al., 2000). However, it is not known whether POP-1 and LIN-39 control *eff-1* expression in Pn.p cells by binding directly to the *eff-1* promoter, or whether they regulate the expression of other transcription factors that do. For simplicity, here we assume that these transcription factors bind directly and independently of each other to specific binding sites in the *eff-1* promoter and control *eff-1* expression in a combinatorial manner, with *eff-1* production only occurring when the activator A, but not LIN-39 and the BAR-1/POP-1 complex, are bound (Fig. 6A in the main text). Assuming that transcription factor (un)binding is rapid compared to *eff-1* expression dynamics, we have the following expression for *eff-1* level  $e$  in time:

$$e_i(t) = \left( \frac{K_W^n}{K_W^n + [c_{\text{BAR-1},i}(t)]^n} \right) \left( \frac{K_L^n}{K_L^n + c_{\text{LIN-39},i}^n} \right) \left( \frac{[c_{A,i}(t)]^n}{K_A^n + [c_{A,i}(t)]^n} \right), \quad (4)$$

where  $c_{\text{BAR-1},i}$ ,  $c_{\text{LIN-39},i}$  and  $c_A$  are the level of BAR-1, LIN-39 and the activator A in cell  $i$ ,  $n$  is a Hill coefficient and  $K_B$ ,  $K_L$  and  $K_A$  are the dissociation constants for the inhibition (BAR-1, LIN-39) and activation (A) of *eff-1* expression, respectively. Here, we assume that BAR-1 and activator levels vary in time but LIN-39 levels remain constant (based on Fig. 3 in the main text). Moreover, we assume that the level of the BAR-1/POP-1 complex scales linearly with  $c_{\text{BAR-1}}$ . To determine whether cell  $i$  assumes hyp7/fusion or VPC fate, we calculate the *eff-1* level  $e_i(t)$  as

function of  $c_{\text{BAR-1},i}(t)$  and  $c_A(t)$  using Eq. 4. If  $e_i(t)$  is larger than a threshold value  $e_{\text{th}}$  for any  
 820 given time  $t$ , cell  $i$  assumes hyp7/fusion rather than VPC fate. Based on the observed BAR-1  
 822 dynamics (Figs. 4 and 5 in the main text), we assume that the BAR-1 level increases linearly  
 with slope  $s_i$  from the BAR-1 pulse onset time,  $t_0^i$ , onwards, with the level at time of fusion,  $t_f^i$   
 given by:

$$c_{\text{BAR-1},i}(t_f^i) = \begin{cases} s_i(t_f^i - t_0^i) & t_f^i > t_0^i \\ 0 & t_f^i \leq t_0^i \end{cases} \quad (5)$$

824 For the dynamics of the activator, we assume  $c_{A,i}(t)=0$  for  $t < t_f^i$  and a positive constant value  
 $c_{A,i}$  for  $t \geq t_f^i$ . We observe significant variability in the slope of the BAR-1 accumulation pulse  
 826 (Fig. 5 in the main text). For that reason, we allow the pulse slope  $s_i$  in cell  $i$  to vary  
 stochastically as:

$$s_i = \langle s \rangle + \eta_s^i, \quad (6)$$

828 where  $\langle s \rangle$  is the average slope and  $\eta_s^i$  is a white noise term that is intrinsic to cell  $i$ , i.e.  $\langle \eta_s^i \rangle = 0$   
 and  $\langle \eta_s^i \cdot \eta_s^j \rangle = \delta_{i,j}(\sigma_s)^2$  where  $\delta_{i,j}$  is the Kronecker delta and  $\sigma_s$  is the standard deviation of the  
 830 noise. Similarly, we assume variability in the level of the activator A:

$$c_{A,i} = \langle c_A \rangle + \eta_A^i. \quad (7)$$

where  $\langle c_A \rangle$  is the average activator level at the time of fusion and  $\eta_A^i$  is a white noise source with  
 832  $\langle \eta_A^i \rangle = 0$  and  $\langle \eta_A^i \cdot \eta_A^j \rangle = \delta_{i,j}(\sigma_A)^2$ .

834 *Pulse and fusion timing.* We experimentally observed variability in pulse onset time and fusion  
 time that can impact the inhibitory BAR-1 level at the time of fusion and, hence, control the  
 836 frequency of hyp7/fusion versus VPC fate. We assume that the pulse onset time in cell  $i$  is given  
 by:

$$t_0^i = \langle t_0 \rangle + \eta_0^c + \eta_0^i, \quad (8)$$

838 where  $\langle t_0 \rangle$  is the average observed pulse onset time,  $\eta_0^c$  is a white noise term common to all  
 cells in an individual animal and  $\eta_0^i$  is a white noise term that is intrinsic to each cell  $i$ , i.e.  
 840  $\langle \eta_0^c \rangle = \langle \eta_0^i \rangle = 0$ ,  $\langle (\eta_0^c)^2 \rangle = (\sigma_0^c)^2$  and  $\langle \eta_0^i \cdot \eta_0^j \rangle = \delta_{i,j}(\sigma_0^{\text{int}})^2$ , with  $\sigma_0^c$  and  $\sigma_0^{\text{int}}$  the standard deviation  
 of the common and intrinsic noise, respectively. For the cell fusion time, we assume:

$$t_f^i = \langle t_0 \rangle + \eta_0^c + \langle \Delta t_f \rangle + \eta_f^i, \quad (9)$$

842 where  $\langle \Delta t_f \rangle$  is the delay between the average pulse onset time and the average time of fusion  
 and  $\eta_f^i$  is a cell-intrinsic white noise term with standard deviation  $\sigma_f$ . Equations 8 and 9  
 844 correspond to a picture where a common signal impacts the Pn.p cells at time  $t = \langle t_0 \rangle + \eta_0^c$  to  
 trigger both the start of the BAR-1 pulse and, after a delay  $\langle \Delta t_f \rangle$ , activation of cell fusion, but  
 846 with added cell-intrinsic variability in the timing of both events.

848 *Constraining model by experiments.* We can constrain many of the model parameters using our  
 experimental observations. For each mutant, we obtain the average pulse slope  $\langle s \rangle$  and  
 850 standard deviation  $\sigma_s$  from the experimentally observed values, allowing us to approximate the

852 experimental observation with a Gaussian distribution with mean  $\langle s \rangle$  and standard deviation  $\sigma_s$   
(Supplemental Fig. 3a,b). We calculate mean pulse onset time as the average of the mean  
onset time in P3.p and P4.p,  $\langle t_0 \rangle = \frac{1}{2}(\langle t_0^3 \rangle + \langle t_0^4 \rangle)$ , i.e. the average of the mean pulse onset  
854 times observed in non-fusing P3.p and P4.p cells. For the variability in pulse onset time, we  
obtain estimates for the standard deviations  $\sigma_0^c$  and  $\sigma_0^{\text{int}}$  using the correlation function  $C_{i,j}^0 =$   
856  $\langle (t_0^i - \langle t_0^i \rangle)(t_0^j - \langle t_0^j \rangle) \rangle$ . In particular, we calculated the standard deviation of the common noise  
from the cross-correlation between the pulse onset in P3.p and P4.p,  $(\sigma_0^c)^2 = C_{3,4}^0$ . Next, using  
858 Eq. 8, we calculated the standard deviation of the cell-intrinsic noise as  $(\sigma_0^{\text{int}})^2 = \frac{1}{2}(C_{3,3}^0 + C_{4,4}^0 -$   
 $2C_{3,4}^0)$ . Using the estimated parameters, we obtained a good fit with the experimentally observed  
860 distribution of pulse onset time in P3.p (Supplemental Fig. 3c,d) and were able to reproduce the  
experimentally measured joint distribution of pulse onset time in P3.p and P4.p in Fig. 5e in the  
862 main text (Supplementary Fig. 3f). Fusing P3.p cells in the *bar-1(++);lin-39(lf)* mutant often  
exhibit a pulse with very low amplitude, making it challenging to determine the exact time of  
864 pulse onset. However, pulse onset is often strongly correlated between cells in the same  
animal. To measure the time between pulse onset and time of fusion, we therefore calculate the  
866 delay between the pulse onset in P4.p and time of fusion in P3.p, as  $\langle \Delta t_f \rangle = \langle t_f^3 - t_0^4 \rangle$ . To  
estimate the standard deviation  $\sigma_f$  we followed different strategies for the two mutant strains  
868 that exhibited Pn.p fusions, *bar-1(++);lin-39(0)* and *bar-1(++);cwn-1(0)*. For the *bar-1(++);lin-*  
*39(0)* strain, P3.p had a much higher fusion frequency than P4.p (Supplementary Table 1) and  
870 we only considered animals where P3.p assumed hyp7/fusion fate and P4.p assumed VPC fate.  
Here, using Eq. 9, we estimated the standard deviation in fusion time as  $(\sigma_f)^2 = C_{ff} - C_{f0}$ ,  
872 where  $C_{ff} = \langle (t_f^3 - \langle t_f^3 \rangle)^2 \rangle$  and  $C_{f0} = \langle (t_f^3 - \langle t_f^3 \rangle)(t_0^4 - \langle t_0^4 \rangle) \rangle$ . For the *bar-1(++);cwn-1(0)* strain,  
P3.p and P4.p have similar, but low hyp7/fusion frequencies. Hence, we considered all animals  
874 where one cell, either P3.p or P4.p, assumed hyp7/fusion fate and the other assumed VPC fate.  
We estimated the standard deviation in fusion time as  $(\sigma_f)^2 = C_{ff} + C_{00} - 2C_{f0} - (\sigma_0^{\text{int}})^2$ , where  
876  $C_{ff} = \langle (t_f - \langle t_f \rangle)^2 \rangle$ ,  $C_{00} = \langle (t_0 - \langle t_0 \rangle)^2 \rangle$  and  $C_{f0} = \langle (t_f - \langle t_f \rangle)(t_0 - \langle t_0 \rangle) \rangle$ . Here,  $\sigma_0^{\text{int}}$  is the  
standard deviation of the cell-intrinsic pulse onset noise as estimated from the pulse onset  
878 timing data. Using the estimated parameter values, the model reproduced the experimentally  
observed correlation between cell fusion time and BAR-1 pulse onset time (Supplemental Fig.  
880 3g).

882 *Parameter values.* Even though we could estimate many model parameters directly from the  
experiments, this was not possible for all parameters. Because we did not observe cell fusions  
884 in the *bar-1(++)* strain, we were unable to measure the parameters  $\langle \Delta t_f \rangle$  and  $\sigma_f$  that dictate the  
timing of expression of the activator A. For that reason, we assumed that the value of these two  
886 parameters was the same as for the *bar-1(++);lin-39(0)* strain. For the threshold *eff-1* level  
above which cell fusion occurs, we chose  $e_{\text{th}} = \frac{1}{2}$  and we assumed that *eff-1* induction occurred  
888 with Hill coefficient  $n=3$  for both inhibitors and the activator. The remaining parameters  $C_A$ ,  $\sigma_A$ ,  
 $K_A$ ,  $c_{\text{LIN-39}}$  and  $K_L$  were chosen so that the resulting frequency of hyp7/fusion fate matched the  
890 experimentally observed frequencies (Supplemental Table S1, Supplementary Fig. 3e), with the

constraint that  $c_{LIN-39}=0$  for the *bar-1(++);lin-39(0)* strain. In addition to the simulations for the  
 892 experimentally examined strains, we also simulated a hypothetical mutant that has the same  
 894 hyp7/fusion frequency as the *bar-1(++);cwn-1(0)* mutant, but achieves this by reducing the BAR-  
 896 1 pulse slope rather than the pulse onset time. For this hypothetical mutant, we used the same  
 898 parameters as for the *bar-1(++)* strain, but lowered the average pulse slope  $\langle s \rangle$  until the desired  
 900 hyp7/fusion frequency was found. For the *bar-1(++)* mutant, we were unable to find parameter  
 combinations for which the hyp7/fusion frequency in the simulations was close to zero, as  
 observed experimentally. This is likely because the fitted distribution of pulse slopes  
 overestimates the number of cells with low pulse slope (Supplemental Fig. 3a) and, hence, low  
 levels of inhibitory BAR-1. A complete list of all parameters is given in the table below:

| Parameter                    | <i>bar-1(++)</i> | <i>bar-1(++);<br/>lin-39(0)</i> | <i>bar-1(++);<br/>cwn-1(0)</i> | Low pulse<br>slope<br>mutant | Parameter<br>estimated from<br>experiment |
|------------------------------|------------------|---------------------------------|--------------------------------|------------------------------|-------------------------------------------|
| $\langle s \rangle$          | 0.33             | 0.27                            | 0.31                           | 0.20                         | Yes                                       |
| $\sigma_s$                   | 0.15             | 0.21                            | 0.13                           | 0.15                         | Yes                                       |
| $\langle t_0 \rangle$        | 0.29             | 0.30                            | 0.53                           | 0.29                         | Yes                                       |
| $\sigma_0^c$                 | 0.051            | 0.095                           | 0.121                          | 0.051                        | Yes                                       |
| $\sigma_0^{int}$             | 0.074            | 0.132                           | 0.018                          | 0.074                        | Yes                                       |
| $K_B$                        | 1.0              | 1.0                             | 1.0                            | 1.0                          | No                                        |
| $\langle \Delta t_f \rangle$ | 0.21             | 0.21                            | 0.11                           | 0.21                         | Yes                                       |
| $\sigma_f$                   | 0.048            | 0.048                           | 0.034                          | 0.048                        | Yes                                       |
| $\langle T_{L2} \rangle$     | 11.2             | 10.2                            | 12.8                           | 11.2                         | Yes                                       |
| $\langle c_A \rangle / K_A$  | 1.3              | 1.3                             | 1.3                            | 1.3                          | No                                        |
| $\sigma_A / K_A$             | 0.3              | 0.3                             | 0.3                            | 0.3                          | No                                        |
| $c_{LIN-39} / K_L$           | 0.8              | 0.0                             | 0.8                            | 0.8                          | No                                        |
| $e_{th}$                     | 0.5              | 0.5                             | 0.5                            | 0.5                          | No                                        |
| $n$                          | 3                | 3                               | 3                              | 3                            | No                                        |

902 *Simulation.* For all simulations, we generated data for two cells, P3.p and P4.p, in  $1 \cdot 10^4$   
 904 animals. For each cell  $i$ , we generated stochastic values for  $s_i$ ,  $c_{A,i}$ ,  $t_0^i$  and  $t_f^i$  according to Eqs.  
 906 6-9, where we discarded pulse slope values  $s_i < 0$  as they are an artifact of fitting the  
 908 experimental distribution by a Gaussian. Based on the values for pulse onset time and pulse  
 slope, we calculated for each cell the inhibitory BAR-1 level  $c_{BAR-1}$  according to Eq. 5, the  
 resulting *eff-1* level according to Eq. 4 and marked each cell as hyp7/fusion rather than VPC  
 fate if the *eff-1* level exceeded the threshold value  $e_{th}$ . In the above table, all times are  
 910 expressed as fraction of larval stage duration. However, to facilitate comparison with the  
 912 experimental distribution, the average pulse slope  $\langle s \rangle$  and its standard deviation  $\sigma_f$  are in units  
 of fluorescence increase per hour. For that reason, when used the pulse slope to calculate the  
 BAR-1 level  $c_{BAR-1}$  in the experimental units of fluorescence (Fig. 6h), we first converted the

914 time between pulse onset and fusion from dimensionless units to hours, by multiplying the  
916 dimensionless time with the average L2 larval stage duration  $\langle T_{L2} \rangle$ .

## 918 Acknowledgements

920 We thank Yvonne Goos and Joleen Traets for coupling *eff-1* primers to Cy5, and Yvonne Goos  
922 for minor technical assistance. We thank Renée van Amerongen, Rik Korswagen, Pieter Rein  
924 ten Wolde, and Tom Shimizu for helpful discussions on the manuscript. This work is part of the  
926 research program of the Netherlands Organisation for Scientific Research (NWO) and was  
performed at the research institute AMOLF. Some *C. elegans* strains were provided by the  
CGC, which is funded by NIH Office of Research Infrastructure Programs (P40 OD010440). The  
work was supported by a European Research Council Starting Grant (338200-  
STOCHCELLFATE) awarded to J.S.v.Z.

928

## Author Contributions

930

932 Conceptualization, J.S.v.Z.; Methodology, J.R.K. and J.S.v.Z.; Formal Analysis: J.R.K., J.T, and  
934 J.S.v.Z.; Investigation, J.R.K., and J.T.; Writing – Original Draft, J.R.K. and J.S.v.Z.; Writing –  
Review & Editing, J.R.K. and J.S.v.Z.; Funding Acquisition, J.S.v.Z.; Supervision, J.S.v.Z.

## 936 Declaration of Interests

938 The authors declare no competing interests.

940

## References

- 942 Alper, S., and Kenyon, C. (2001). REF-1, a protein with two bHLH domains, alters the pattern of  
cell fusion in *C. elegans* by regulating Hox protein activity. *Development* 128, 1793–1804.
- 944 Alper, S., and Kenyon, C. (2002). The zinc finger protein REF-2 functions with the Hox genes to  
inhibit cell fusion in the ventral epidermis of *C. elegans*. *Development* 129, 3335–3348.
- 946 Balaban, N.Q. (2004). Bacterial Persistence as a Phenotypic Switch. *Science* 305, 1622–1625.
- 948 Brabin, C., Appleford, P.J., and Woollard, A. (2011). The *Caenorhabditis elegans* GATA Factor  
ELT-1 Works through the Cell Proliferation Regulator BRO-1 and the Fusogen EFF-1 to  
Maintain the Seam Stem-Like Fate. *PLoS Genet.* 7, e1002200.
- 950 Braendle, C., and Félix, M.A. (2008). Plasticity and Errors of a Robust Developmental System in  
Different Environments. *Dev. Cell* 15, 714–724.
- 952 Brenner, S. (1974). THE GENETICS OF CAENORHABDITIS ELEGANS. *Genetics* 77, 71–94.
- 954 Chen, Z., and Han, M. (2001). *C. elegans* Rb NuRD and Ras regulate lin-39-mediated cell  
fusion during vulval fate specification. *Curr. Biol.* 11, 1874–1879.
- 956 Clark, S.G., Chisholm, A.D., and Horvitz, H.R. (1993). Control of cell fates in the central body  
region of *C. elegans* by the homeobox gene lin-39. *Cell* 74, 43–55.
- 958 Clevers, H., and Nusse, R. (2012). Wnt/ $\beta$ -catenin signaling and disease. *Cell* 149, 1192–1205.
- 960 Coudreuse, D.Y.M., Giulietta, R., Betist, M.C., Destree, O., and Korswagen, H.C. (2006). Wnt  
Gradient Formation Requires Retromer Function in Wnt-Producing Cells. *Science* 312,  
921–924.
- 962 Edelstein, A.D., Tsuchida, M.A., Amodaj, N., Pinkard, H., Vale, R.D., and Stuurman, N. (2014).  
Advanced methods of microscope control using  $\mu$ Manager software. *J. Biol. Methods* 1,  
10.
- 964 Eisenmann, D.M. (2005). Wnt signaling. *WormBook* 1–17.
- 966 Eisenmann, D.M., Maloof, J.N., Simske, J.S., Kenyon, C., and Kim, S.K. (1998). The beta-  
catenin homolog BAR-1 and LET-60 Ras coordinately regulate the Hox gene lin-39 during  
*Caenorhabditis elegans* vulval development. *Development* 125, 3667–3680.
- 968 Eric Jones, Oliphant, T., and Peterson, P. (2001). SciPy: Open Source Scientific Tools for  
Python. <http://www.scipy.org/>.
- 970 Félix, M.A. (2012). *Caenorhabditis elegans* vulval cell fate patterning. *Phys. Biol.* 9.
- 972 Gleason, J.E., Korswagen, H.C., and Eisenmann, D.M. (2002). Activation of Wnt signaling  
bypasses the requirement for RTK/Ras signaling during *C. elegans* vulval induction.  
*Genes Dev.* 16, 1281–1290.
- 974 Gleason, J.E., Szyleyko, E. a., and Eisenmann, D.M. (2006). Multiple redundant Wnt signaling  
components function in two processes during *C. elegans* vulval development. *Dev. Biol.*  
298, 442–457.
- 978 Goentoro, L., and Kirschner, M.W. (2009). Evidence that Fold-Change, and Not Absolute Level,  
of  $\beta$ -Catenin Dictates Wnt Signaling. *Mol. Cell* 36, 872–884.
- 980 Green, J.L., Inoue, T., and Sternberg, P.W. (2008). Opposing Wnt Pathways Orient Cell Polarity  
during Organogenesis. *Cell* 134, 646–656.
- 982 Gritti, N., Kienle, S., Filina, O., and van Zon, J.S. (2016). Long-term time-lapse microscopy of *C.*  
*elegans* post-embryonic development. *Nat. Commun.* 7, 12500.
- 984 Gupta, B.P., Hanna-Rose, W., and Sternberg, P.W. (2012). Morphogenesis of the vulva and the  
vulval-uterine connection\*. *WormBook* 1–17.
- 986 Harterink, M., Kim, D.H., Middelkoop, T.C., Doan, T.D., van Oudenaarden, A., and Korswagen,  
H.C. (2011). Neuroblast migration along the anteroposterior axis of *C. elegans* is  
controlled by opposing gradients of Wnts and a secreted Frizzled-related protein.  
*Development* 138, 2915–2924.
- 988 Hendriks, G.J., Gaidatzis, D., Aeschmann, F., and Großhans, H. (2014). Extensive Oscillatory  
Gene Expression during *C. elegans* Larval Development. *Mol. Cell* 53, 380–392.
- 990

- 992 Hill, R.J., and Sternberg, P.W. (1993). Cell fate patterning during *C. elegans* vulval  
development. *Development* 18, 9–18.
- 994 Hirabayashi, Y. (2004). The Wnt/ $\beta$ -catenin pathway directs neuronal differentiation of cortical  
neural precursor cells. *Development* 131, 2791–2801.
- 996 Hudson, C., Kawai, N., Negishi, T., and Yasuo, H. (2013). B-Catenin-Driven Binary Fate  
Specification Segregates Germ Layers in Ascidian Embryos. *Curr. Biol.* 23, 491–495.
- 998 Huelsz-Prince, G., and van Zon, J.S. (2017). Canalization of *C. elegans* Vulva Induction against  
Anatomical Variability. *Cell Syst.* 4, 219–230.e6.
- 1000 Jho, E., Zhang, T., Domon, C., Joo, C., Freund, J., and Costantini, F. (2002). Wnt/ $\beta$ -Catenin/Tcf  
Signaling Induces the Transcription of Axin2, a Negative Regulator of the Signaling  
Pathway. *Mol. Cell. Biol.* 22, 1172–1183.
- 1002 Johnston, R.J., and Desplan, C. (2010). Stochastic Mechanisms of Cell Fate Specification that  
Yield Random or Robust Outcomes. *Annu. Rev. Cell Dev. Biol.* 26, 689–719.
- 1004 Kafri, P., Hasenson, S.E., Kanter, I., Sheinberger, J., Kinor, N., Yunger, S., and Shav-Tal, Y.  
(2016). Quantifying  $\beta$ -catenin subcellular dynamics and cyclin D1 mRNA transcription  
during Wnt signaling in single living cells. *Elife* 5.
- 1006 Kim, S., Ishidate, T., Sharma, R., Soto, M.C., Conte, D., Mello, C.C., and Shirayama, M. (2013).  
Wnt and CDK-1 regulate cortical release of WRM-1/ $\beta$ -catenin to control cell division  
orientation in early *Caenorhabditis elegans* embryos. *Proc. Natl. Acad. Sci.* 110, E918–  
E927.
- 1010 Koh, K., Peyrot, S.M., Wood, C.G., Wagmaister, J.A., Maduro, M.F., Eisenmann, D.M., and  
Rothman, J.H. (2002). Cell fates and fusion in the *C. elegans* vulval primordium are  
regulated by the EGL-18 and ELT-6 GATA factors -- apparent direct targets of the LIN-39  
Hox protein. *Development* 129, 5171–5180.
- 1012 Korswagen, H.C. (2002). Canonical and non-canonical Wnt signaling pathways in  
1016 *Caenorhabditis elegans*: Variations on a common signaling theme. *BioEssays* 24, 801–  
810.
- 1018 Korswagen, H.C., Herman, M. a, and Clevers, H.C. (2000). Distinct beta-catenins mediate  
adhesion and signalling functions in *C. elegans*. *Nature* 406, 527–532.
- 1020 de la Cova, C., Townley, R., Regot, S., and Greenwald, I. (2017). A Real-Time Biosensor for  
ERK Activity Reveals Signaling Dynamics during *C. elegans* Cell Fate Specification. *Dev.*  
1022 *Cell* 42, 542–553.e4.
- 1024 Levine, J.H., Lin, Y., and Elowitz, M.B. (2013). Functional Roles of Pulsing. *Science* 342, 1193–  
1200.
- 1026 Lin, Y., Sohn, C.H., Dalal, C.K., Cai, L., and Elowitz, M.B. (2015). Combinatorial gene regulation  
by modulation of relative pulse timing. *Nature* 527, 54–58.
- 1028 Lindström, N.O., Lawrence, M.L., Burn, S.F., Johansson, J.A., Bakker, E.R.M., Ridgway, R.A.,  
Chang, C.H., Karolak, M.J., Oxburgh, L., Headon, D.J., et al. (2014). Integrated  $\beta$ -catenin,  
BMP, PTEN, and Notch signalling patterns the nephron. *Elife* 3, e04000.
- 1030 Liu, Z., Fujii, T., Nukazuka, A., Kurokawa, R., Suzuki, M., Fujisawa, H., and Takagi, S. (2005).  
1032 *C. elegans* PlexinA PLX-1 mediates a cell contact-dependent stop signal in vulval  
precursor cells. *Dev. Biol.* 282, 138–151.
- 1034 Losick, R., and Desplan, C. (2008). Stochasticity and Cell Fate. *Science* 320, 65–68.
- 1036 Maamar, H., Raj, A., and Dubnau, D. (2007). Noise in Gene Expression Determines Cell Fate in  
*Bacillus subtilis*. *Science* (80- ). 317, 526–529.
- 1038 Maloof, J.N., and Kenyon, C. (1998). The Hox gene lin-39 is required during *C. elegans* vulval  
induction to select the outcome of Ras signaling. *Development* 125, 181–190.
- 1040 MCKAY, S.J., JOHNSEN, R., KHATTRA, J., ASANO, J., BAILLIE, D.L., CHAN, S., DUBE, N.,  
FANG, L., GOSZCZYNSKI, B., HA, E., et al. (2003). Gene Expression Profiling of Cells,  
Tissues, and Developmental Stages of the Nematode *C. elegans*. *Cold Spring Harb.*  
*Symp. Quant. Biol.* 68, 159–170.

- 1042 Mila, D., Calderon, A., Baldwin, A.T., Moore, K.M., Watson, M., Phillips, B.T., and Putzke, A.P.  
1044 (2015). Asymmetric Wnt pathway signaling facilitates stem cell-like divisions via the  
nonreceptor tyrosine kinase FRK-1 in *Caenorhabditis elegans*. *Genetics* 201, 1047–1060.
- 1046 Mohler, W. a, Shemer, G., del Campo, J.J., Valansi, C., Opoku-Serebuoh, E., Scranton, V.,  
Assaf, N., White, J.G., and Podbilewicz, B. (2002). The type I membrane protein EFF-1 is  
essential for developmental cell fusion. *Dev. Cell* 2, 355–362.
- 1048 Mucenski, M.L., Wert, S.E., Nation, J.M., Loudy, D.E., Huelsken, J., Birchmeier, W., Morrisey,  
E.E., and Whitsett, J.A. (2003).  $\beta$ -Catenin Is Required for Specification of Proximal/Distal  
1050 Cell Fate During Lung Morphogenesis. *J. Biol. Chem.* 278, 40231–40238.
- 1052 Myers, T.R., and Greenwald, I. (2007). Wnt signal from multiple tissues and lin-3/EGF signal  
from the gonad maintain vulval precursor cell competence in *Caenorhabditis elegans*.  
*Proc. Natl. Acad. Sci. U. S. A.* 104, 20368–20373.
- 1054 Ohyama, T. (2006). Wnt signals mediate a fate decision between otic placode and epidermis.  
*Development* 133, 865–875.
- 1056 Pani, A.M., and Goldstein, R. (2018). Direct visualization of a native Wnt in vivo reveals that a  
long-range Wnt gradient forms by extracellular dispersal. *Elife* 7.
- 1058 Park, F.D., and Priess, J.R. (2003). Establishment of POP-1 asymmetry in early *C. elegans*  
embryos. *Development* 130, 3547–3556.
- 1060 Pénigault, J.B., and Félix, M.A. (2011a). Evolution of a system sensitive to stochastic noise:  
P3.p cell fate in *Caenorhabditis*. *Dev. Biol.* 357, 419–427.
- 1062 Pénigault, J.B., and Félix, M.A. (2011b). High sensitivity of *C. elegans* vulval precursor cells to  
the dose of posterior Wnts. *Dev. Biol.* 357, 428–438.
- 1064 Podbilewicz, B., Leikina, E., Sapir, A., Valansi, C., Suissa, M., Shemer, G., and Chernomordik,  
L. V. (2006). The *C. elegans* Developmental Fusogen EFF-1 Mediates Homotypic Fusion  
1066 in Heterologous Cells and In Vivo. *Dev. Cell* 11, 471–481.
- Raj, A., van den Bogaard, P., Rifkin, S.A., van Oudenaarden, A., and Tyagi, S. (2008). Imaging  
1068 individual mRNA molecules using multiple singly labeled probes. *Nat. Methods* 5, 877–  
879.
- 1070 Robertson, S.M., Medina, J., Oldenbroek, M., and Lin, R. (2017). Reciprocal signaling by Wnt  
and Notch specifies a muscle precursor in the *C. elegans* embryo. *Development* 144,  
1072 419–429.
- Roiz, D., Escobar-Restrepo, J.M., Leu, P., and Hajnal, A. (2016). The *C. elegans* hox gene lin-  
1074 39 controls cell cycle progression during vulval development. *Dev. Biol.* 418, 124–134.
- Roorda, A., and Williams, D.R. (1999). The arrangement of the three cone classes in the living  
1076 human eye. *Nature* 397, 520–522.
- Sarov, M., Murray, J.I., Schanze, K., Pozniakovski, A., Niu, W., Angermann, K., Hasse, S.,  
1078 Rupprecht, M., Vinis, E., Tinney, M., et al. (2012). A Genome-Scale Resource for In Vivo  
Tag-Based Protein Function Exploration in *C. elegans*. *Cell* 150, 855–866.
- 1080 Sawa, H., and Korswagen, H.C. (2013). Wnt signaling in *C. elegans*. *WormBook* 1–30.
- Schindelin, J., Arganda-Carreras, I., Frise, E., Kaynig, V., Longair, M., Pietzsch, T., Preibisch,  
1082 S., Rueden, C., Saalfeld, S., Schmid, B., et al. (2012). Fiji: An open-source platform for  
biological-image analysis. *Nat. Methods* 9, 676–682.
- 1084 Schneider, C.A., Rasband, W.S., and Eliceiri, K.W. (2012). NIH Image to ImageJ: 25 years of  
image analysis. *Nat. Methods* 9, 671–675.
- 1086 Shemer, G., and Podbilewicz, B. (2002). LIN-39 / Hox triggers cell division and represses vulval  
cell fusion. *Genes Dev.* 16, 3136–3141.
- 1088 Shemer, G., Suissa, M., Kolotuev, I., Nguyen, K.C., Hall, D.H., and Podbilewicz, B. (2004). EFF-  
1 is sufficient to initiate and execute tissue-specific cell fusion in *C. elegans*. *Curr Biol* 14,  
1090 1587–1591.
- Shimojo, H., Ohtsuka, T., and Kageyama, R. (2008). Oscillations in Notch Signaling Regulate  
1092 Maintenance of Neural Progenitors. *Neuron* 58, 52–64.



- 1094 Smallwood, P.M., Wang, Y., and Nathans, J. (2002). Role of a locus control region in the  
mutually exclusive expression of human red and green cone pigment genes. *Proc. Natl.  
Acad. Sci. U. S. A.* *99*, 1008–1011.
- 1096 Smurova, K., and Podbilewicz, B. (2016). RAB-5- and DYNAMIN-1-Mediated Endocytosis of  
EFF-Fusogen Controls Cell-Cell Fusion. *Cell Rep.* *14*, 1517–1527.
- 1098 Sonnen, K.F., Lauschke, V.M., Uraji, J., Falk, H.J., Petersen, Y., Funk, M.C., Beaupeux, M.,  
François, P., Merten, C.A., and Aulehla, A. (2018). Modulation of Phase Shift between  
1100 Wnt and Notch Signaling Oscillations Controls Mesoderm Segmentation. *Cell* *172*, 1079–  
1081.e12.
- 1102 Sternberg, P.W., and Horvitz, H.R. (1986). Pattern formation during vulval development in *C.*  
*elegans*. *Cell* *44*, 761–772.
- 1104 Süel, G.M., Garcia-Ojalvo, J., Liberman, L.M., and Elowitz, M.B. (2006). An excitable gene  
regulatory circuit induces transient cellular differentiation. *Nature* *440*, 545–550.
- 1106 Sulston, J.E., Schierenberg, E., White, J.G., and Thomson, J.N. (1983). The embryonic cell  
lineage of the nematode *Caenorhabditis elegans*. *Dev. Biol.* *100*, 64–119.
- 1108 The *C. elegans* Deletion Mutant Consortium (2012). Large-Scale Screening for Targeted  
Knockouts in the *Caenorhabditis elegans* Genome. *G3* *2*, 1415–1425.
- 1110 Wang, B.B., Müller-Immergluck, M.M., Austin, J., Robinson, N.T., Chisholm, A., and Kenyon, C.  
(1993). A homeotic gene cluster patterns the anteroposterior body axis of *C. elegans*. *Cell*  
1112 *74*, 29–42.
- 1114 Yu, H., Seah, A., Herman, M.A., Ferguson, E.L., Horvitz, H.R., and Sternberg, P.W. (2009). Wnt  
and EGF pathways act together to induce *C. elegans* male hook development. *Dev. Biol.*  
*327*, 419–432.
- 1116 Zeev-Ben-Mordehai, T., Vasishtan, D., Siebert, C.A., and Grünewald, K. (2014). The full-length  
cell-cell fusogen EFF-1 is monomeric and upright on the membrane. *Nat. Commun.* *5*,  
1118 3912.
- 1120 Zernicka-Goetz, M., Morris, S.A., and Bruce, A.W. (2009). Making a firm decision: Multifaceted  
regulation of cell fate in the early mouse embryo. *Nat. Rev. Genet.* *10*, 467–477.
- 1122

**Table S1**

| Genotype                                                                                                               | Fusion rates (%) <sup>a</sup> |      |      |      |      |      |            |
|------------------------------------------------------------------------------------------------------------------------|-------------------------------|------|------|------|------|------|------------|
|                                                                                                                        | P3.p                          | P4.p | P5.p | P6.p | P7.p | P8.p | N          |
| <i>ncls13[ajm-1::GFP]</i> <sup>b</sup>                                                                                 | 28                            | 0    | 0    | 0    | 0    | 0    | <b>57</b>  |
| <i>ouls20[ajm-1::mCherry]</i> <sup>b</sup>                                                                             | 37                            | 0    | 0    | 0    | 0    | 0    | <b>30</b>  |
| <i>cwn-1(ok546);ncls13[ajm-1::GFP]</i><br><b><i>cwn-1(0)</i></b>                                                       | 90                            | 83   | 0    | 0    | 0    | 0    | <b>41</b>  |
| <i>bar-1(ga80);ncls13[ajm-1::GFP]</i><br><b><i>bar-1(0)</i></b>                                                        | 80                            | 76   | 4    | 0    | 0    | 4    | <b>25</b>  |
| <i>lin-39(gk893);ncls13[ajm-1::GFP]</i> <sup>c</sup><br><b><i>lin-39(0)</i></b>                                        | 100                           | 100  | 100  | 100  | 100  | 100  | <b>17</b>  |
| <i>lin-39(n709);ouls20[ajm-1::mCherry]</i><br><b><i>lin-39(lf)</i></b>                                                 | 69                            | 19   | 0    | 0    | 19   | 50   | <b>16</b>  |
| <i>lin-39::GFP;HIS24-H2B::mCherry;</i><br><i>ncls13[ajm-1::GFP]</i><br><b><i>lin-39(++)</i></b>                        | 2                             | 0    | 0    | 0    | 0    | 0    | <b>48</b>  |
| <i>cwn-1(ok546);lin-39::GFP;HIS24-</i><br><i>H2B::mCherry;ncls13[ajm-1::GFP]</i><br><b><i>cwn-1(0); lin-39(++)</i></b> | 20                            | 14   | 1    | 0    | 0    | 0    | <b>126</b> |
| <i>bar-1::GFP;ouls20[ajm-1::mCherry]</i><br><b><i>bar-1(++)</i></b>                                                    | 0                             | 0    | 0    | 0    | 0    | 0    | <b>30</b>  |
| <i>bar-1::GFP;cwn-1(ok546);ouls20[ajm-</i><br><i>1::mCherry]</i><br><b><i>cwn-1(0); bar-1(++)</i></b>                  | 6                             | 8    | 0    | 0    | 0    | 0    | <b>64</b>  |
| <i>bar-1::GFP;lin-39(n709);ouls20 [ajm-</i><br><i>1::mCherry]</i><br><b><i>lin-39(lf); bar-1(++)</i></b>               | 24                            | 4    | 3    | 0    | 13   | 19   | <b>70</b>  |

1124

Pn.p fusion frequencies in different genetic backgrounds with time-lapse microscopy techniques.

1126

<sup>a</sup> Fusion rates are rounded to the nearest percentage. Fusion events were counted by the loss of *ajm-1* staining during the L2 stage, and non-fusion animals were only counted if the animal reached the L3 ecdysis without a fusion event.

1128

1130

<sup>b</sup> No statistical difference between P3.p fusion rates in these marker strains, (P= 0.47, Fisher's Exact Test).

1132

<sup>c</sup> P3.p – P8.p fused prematurely in the L1 stage in the null mutant.

1134

## Figure S1

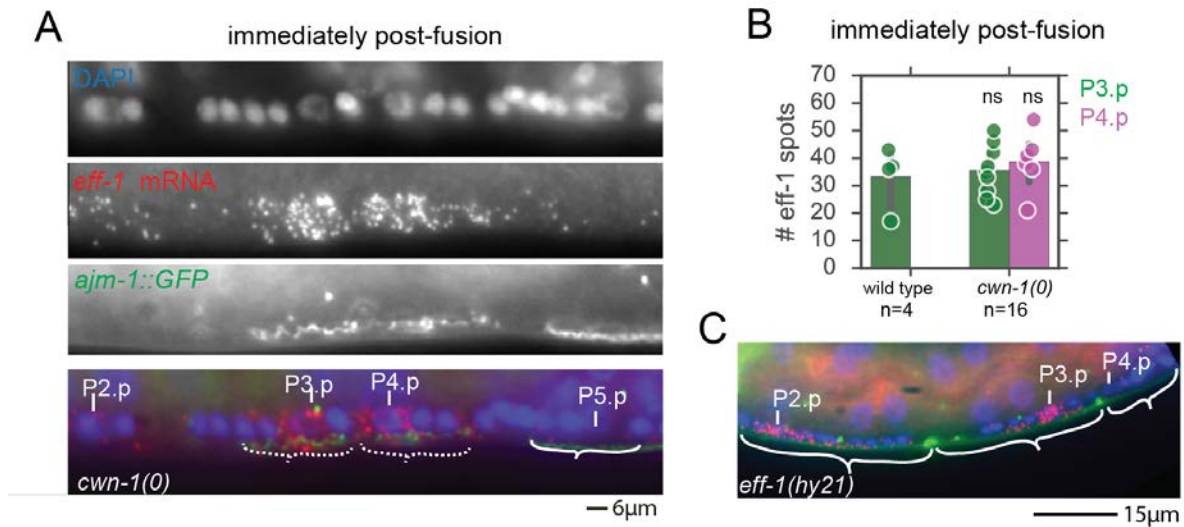

1136

**Figure S1. The gene *eff-1* is expressed at a high level before cell fusion.**

1138

**(A)** Example of an animal with both P3.p and P4.p showing evidence of recent fusion, due to the currently degrading and ruffled appeared of AJM-1::GFP, marked by dashed-white brackets in the composite image (bottom panel). **(B)** Quantification of the number of *eff-1* spots in cells that have recently fused as in (A). Different genetic backgrounds show similar levels of *eff-1* expression at the time of fusion. Dots correspond to individual cells and are plotted with the average and standard error. No significant differences are present in the average number of *eff-1* spots (Student's t-test). **(C)** Image of a mid-L2 stage *eff-1(hy21)* temperature-sensitive-mutant with a point mutation that renders the protein non-functional, but allows for mRNA staining with smFISH probes. High levels of *eff-1* expression are seen in P2.p and P3.p, despite them remaining unfused (marked by white brackets).

1140

1142

1144

1146

1148

## Figure S2

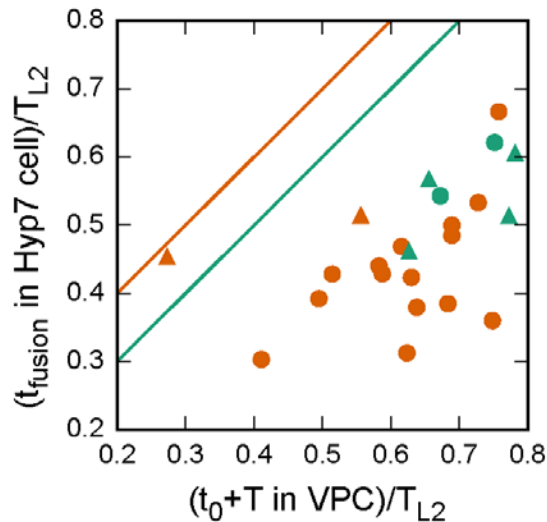

1150

### Figure S2. Correlation between BAR-1 pulse end time and time of fusion

1152

Correlation between BAR-1 pulse end time  $t_0 + T$  in a VPC and fusion time  $t_{\text{fusion}}$  in a

1154

hyp7/fusion cell, where  $t_0$  is the pulse onset time and  $T$  the pulse duration. Circles correspond

1156

to animals where P3.p, but not P4.p, assumed hyp7/fusion fate and triangles to animals where

1158

the cell fate assignment is reversed. Color indicates the *bar-1(++);lin-39(lf)* (orange) and *bar-*

*1(++);cwn-1(0)* (green) mutants. The lines correspond to  $t_{\text{fusion}} / T_{L2} = \Delta T + t_0 / T_{L2}$ , with  $\Delta T = 0.2$

(orange) and  $\Delta T = 0.1$  (green), and are the same as those in Fig. 5g in the main text. The

correlation between pulse end time and time of fusion is weaker than that between pulse start

time and time of fusion (Fig. 5g in the main text).

1160

## Figure S3

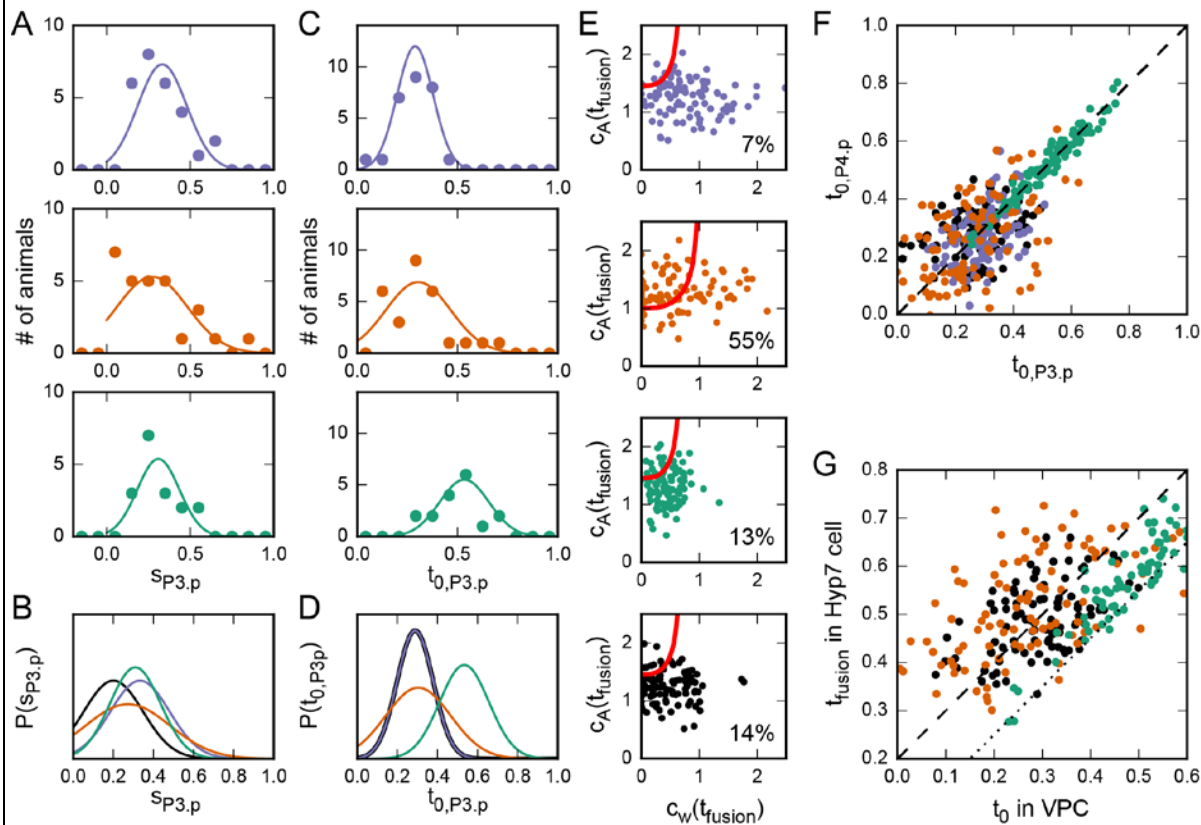

1162

### Figure S3. Fitting minimal model to experimental observations.

1164

(A) Experimentally observed distribution of BAR-1 pulse slope  $s$  in the P3.p cell (markers) and the Gaussian fit used in the model (solid line). Color denotes the *bar-1(++)* (purple), *bar-1(++);lin-39(lf)* (orange) and *bar-1(++);cwn-1(0)* (green) mutants. (B) Comparison of pulse slope distributions in the model. Included are the distributions for the mutants in (A) and a hypothetical mutant with *hyp7/fusion* frequency similar to *bar-1(++);cwn-1(0)* but achieved by decreasing pulse slope rather than delaying pulse onset.

1166

(C) Experimentally observed distribution of BAR-1 pulse onset time  $t_0$  (markers) in the P3.p cell and the Gaussian fit (solid line). Color indicates the different mutant strains. (D) Comparison of pulse onset time between the different mutants. The distributions for the *bar-1(++)* (purple) and low pulse slope (black) mutants overlap.

1168

(E) Model simulations of cell fate decisions in the *bar-1(++)* (purple), *bar-1(++);lin-39(lf)* (orange), *bar-1(++);cwn-1(0)* (green) and low pulse slope (black) mutant. Each marker indicates the activator level  $c_A$  and inhibitory Wnt level  $c_W$  at the fusion time  $t_{\text{fusion}}$  for a single simulation. The red line indicates the boundary between activator and Wnt inhibition levels that result in *hyp7/fusion* fate (high  $c_A$ , low  $c_W$ ) or VPC fate (other). The lack of LIN-39 inhibition enlarges the *hyp7/fusion* region in the *bar-1(++);lin-39(lf)* mutant. For each mutant the *hyp7/fusion* frequency, calculated from  $1 \cdot 10^6$  simulations, is given.

1172

(F) Correlation between pulse onset time in the P3.p and P4.p cell in the same animal, generated by the model. Data is for the different mutants in (E). (G) Correlation between pulse onset time in P4.p and time of fusion in P3.p in animals where P3.p, but not P4.p, assumes *hyp7/fusion* fate. Color corresponds to the different mutants in (E). The lines correspond to  $t_{\text{fusion}}/T_{L2} = \Delta T + t_0/T_{L2}$ , with  $\Delta T=0.2$  (dashed line) and  $\Delta T=0.1$  (dotted line).

1176

1178

1180

1182

1184

## Figure S4

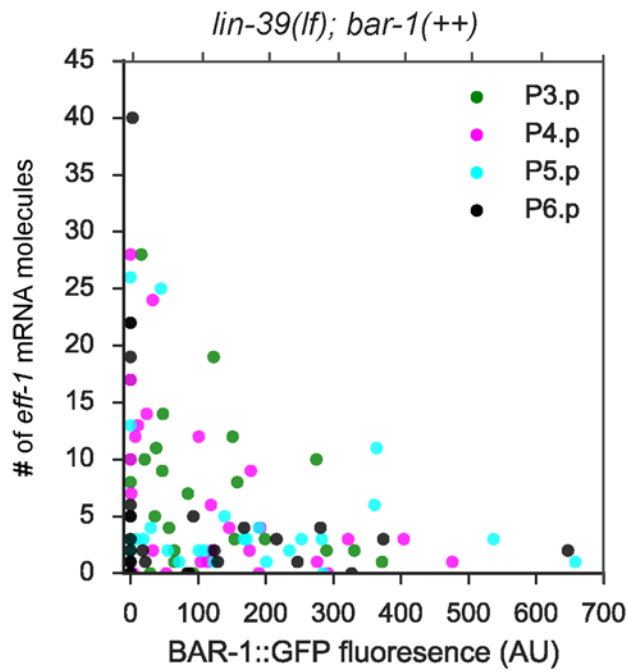

1186

Figure S4. **Inverse relationship between *eff-1* expression and BAR-1::GFP levels.**

1188

Number of *eff-1* mRNA molecules, as measured using smFISH, compared to the BAR-1::GFP fluorescence level in different Pn.p cells, with each marker corresponding to a single cell. BAR-1::GFP levels are permissive for high levels of *eff-1* expression, while high levels of BAR-1::GFP fluorescence block *eff-1* expression.

1190

## 1192 Supplemental Movies

1194 **Movie S1:** (Top panel) Apical junction marker AJM-1::mCherry and (bottom panel) GFP  
1196 expressed in the hypodermal syncytium hyp7 for a P3.p cell assuming hyp7/fusion fate. At the  
1198 time of fusion with hyp7, 6h20m after the start of the L2 larval stage, pronounced ruffling of  
AJM-1 is followed by its removal from P3.p. Concomitantly, GFP flows from the hyp7 syncytium  
into P3.p, as indicated by the yellow arrow. A *dpy-7p::mCherry* nuclear marker was used for cell  
identification (top panel).

1200 **Movie S2:** (Top panel) Apical junction marker AJM-1::mCherry and (bottom panel) GFP  
1202 expressed in the hypodermal syncytium hyp7 for a P3.p cell that assumes vulva precursor cell  
1204 fate. AJM-1 is present in P3.p throughout the entire L2 larval stage and no inflow of GFP into  
P3.p is observed. A *dpy-7p::mCherry* nuclear marker was used for cell identification (top panel).

1206 **Movie S3:** Pulsatile BAR-1 dynamics in P(3-5).p cells in a single animal. Time is relative to the  
1208 start of the L2 larval stage. Each panel corresponds to a single cell. Shown are the apical  
junction marker AJM-1 (magenta) and BAR-1::GFP (green). The animal examined corresponds  
to that shown in Fig. 4a,b.

1210

## Supplemental Methods Table 1

1212 smFISH probes used to hybridize with *eff-1* mRNA molecules

| Primer # | Probe (5'-> 3')      |
|----------|----------------------|
| 1        | aactggggagaccactcaaa |
| 2        | gtaactgctaggagaagcag |
| 3        | ctcgagtggaaatccgtagg |
| 4        | ggaagagcccatcgaatttc |
| 5        | tgtcttggaacagtgtggtg |
| 6        | gagatgtttgagcacggaca |
| 7        | atctgaagcagactgcagtg |
| 8        | tcattgatctcttgggatgc |
| 9        | tccaaaagtgtaccgctgag |
| 10       | aactggcatgaacttcaggg |
| 11       | atgtggcatcacactcacag |
| 12       | agattctgcggtacatgttg |
| 13       | ctggacaagcggtaactga  |
| 14       | gtttcatcagacttatcaga |
| 15       | gaacgtgcggtagcatgaag |
| 16       | cgattgggtgtctgattggg |
| 17       | caaagcttggggatgtcgtc |
| 18       | tggcttgaatcgaacgtcac |
| 19       | gactgcgaggaatgtcatat |
| 20       | acgtttaggttgttctagt  |
| 21       | gctgcgtagacaaatgttgc |
| 22       | tttatctttttccaccaat  |
| 23       | tgtgttccaccatctaattg |
| 24       | cgacgtttttggtcgagatg |
| 25       | ggcagttacagccaatgaaa |
| 26       | cagttgatgagatgctcgtc |

| Primer # | Probe (5'-> 3')       |
|----------|-----------------------|
| 27       | ctccattacttgttcttgag  |
| 28       | ttgcattctcagttcttctg  |
| 29       | attgtctgtaatctcattca  |
| 30       | accatccaagacggtcaaag  |
| 31       | atgaccagaatcgccattc   |
| 32       | tcacaactccattattcaca  |
| 33       | gccttgtgaatatcatccat  |
| 34       | gctctttgcaatttttcact  |
| 35       | acttcaagtggacgagtcaa  |
| 36       | tcgagcagattgaatccaag  |
| 37       | gtgttacaacagcttgtctg  |
| 38       | tgaagattagttccttcggc  |
| 39       | gacaaggttttgactttcca  |
| 40       | agtcaacgaattcttgatgca |
| 41       | tcaacgatgatggatccact  |
| 42       | agcctcatatactgtcaagt  |
| 43       | ctgatccatcaatttttcca  |
| 44       | tccaaatccagttgacatct  |
| 45       | gcagtgaatgtgtgaattgt  |
| 46       | cggtttgaagcatgaagatc  |
| 47       | atggctggcagtggaataat  |

1214
